# Supplementary material for: Polynuclear ampyrone based 3d coordination clusters
Source: Royal Society of Chemistry journal article supplement (doi:10.1039/c7ce02093g), 2018-01-01
Supplement: c7ce02093g1.pdf [file c7ce02093g1.pdf]

## Electronic Supporting Information

### Polynuclear Ampyrone based 3d Coordination Clusters

Stavroula I. Sampani,<sup>a</sup> Edward Loukopoulos,<sup>a</sup> Kieran Griffiths,<sup>a</sup> Mohammad Azam,<sup>a,b</sup> Graham Tizzard,<sup>c</sup> Simon Coles,<sup>c</sup> Albert Escuer,<sup>\*d</sup> Athanassios Tsipis<sup>\*e</sup> and George E Kostakis<sup>\*a</sup>

**Table S1.** Crystal data and structure refinement for HL<sup>1</sup> and compounds 1-4.

| Compound                                    | HL <sup>1</sup>                                               | 1                                                               | 2                                                               | 3                                                               | 4                                                                                |
|---------------------------------------------|---------------------------------------------------------------|-----------------------------------------------------------------|-----------------------------------------------------------------|-----------------------------------------------------------------|----------------------------------------------------------------------------------|
| Empirical formula                           | C <sub>18</sub> H <sub>17</sub> N <sub>3</sub> O <sub>2</sub> | C <sub>42</sub> H <sub>41</sub> N <sub>9</sub> NiO <sub>4</sub> | C <sub>42</sub> H <sub>41</sub> CoN <sub>9</sub> O <sub>4</sub> | C <sub>23</sub> H <sub>27</sub> CuN <sub>3</sub> O <sub>5</sub> | C <sub>64</sub> H <sub>64</sub> ClCu <sub>2</sub> N <sub>7</sub> O <sub>13</sub> |
| Formula weight                              | 307.34                                                        | 794.55                                                          | 794.77                                                          | 489.01                                                          | 1301.75                                                                          |
| Temperature/K                               | 173                                                           | 173.0                                                           | 173                                                             | 100(2)                                                          | 100(2)                                                                           |
| Crystal system                              | monoclinic                                                    | monoclinic                                                      | monoclinic                                                      | triclinic                                                       | orthorhombic                                                                     |
| Space group                                 | P2 <sub>1</sub> /n                                            | P2 <sub>1</sub> /n                                              | P2 <sub>1</sub> /n                                              | P-1                                                             | P2 <sub>1</sub> 2 <sub>1</sub> 2                                                 |
| a/Å                                         | 7.4861(3)                                                     | 13.9150(2)                                                      | 13.8963(3)                                                      | 6.8165(3)                                                       | 13.4231(4)                                                                       |
| b/Å                                         | 7.4773(3)                                                     | 13.7467(2)                                                      | 13.7996(3)                                                      | 12.1809(6)                                                      | 30.1689(9)                                                                       |
| c/Å                                         | 27.3003(10)                                                   | 20.8267(4)                                                      | 20.7755(5)                                                      | 13.8681(5)                                                      | 14.2158(4)                                                                       |
| α/°                                         | 90                                                            | 90                                                              | 90                                                              | 97.444(3)                                                       | 90                                                                               |
| β/°                                         | 95.532(4)                                                     | 107.3925(19)                                                    | 107.426(2)                                                      | 98.421(3)                                                       | 90                                                                               |
| γ/°                                         | 90                                                            | 90                                                              | 90                                                              | 102.838(4)                                                      | 90                                                                               |
| Volume/Å <sup>3</sup>                       | 1521.04(11)                                                   | 3801.68(12)                                                     | 3801.13(15)                                                     | 1094.80(8)                                                      | 5756.8(3)                                                                        |
| Z                                           | 4                                                             | 4                                                               | 4                                                               | 2                                                               | 4                                                                                |
| ρ <sub>calc</sub> /g/cm <sup>3</sup>        | 1.342                                                         | 1.388                                                           | 1.389                                                           | 1.483                                                           | 1.502                                                                            |
| μ/mm <sup>1</sup>                           | 0.725                                                         | 1.193                                                           | 0.508                                                           | 1.038                                                           | 0.860                                                                            |
| F(000)                                      | 648.0                                                         | 1664.0                                                          | 1660.0                                                          | 510.0                                                           | 2704.0                                                                           |
| Crystal size/mm <sup>3</sup>                | 0.21 × 0.14 × 0.08                                            | 0.2 × 0.14 × 0.1                                                | 0.16 × 0.14 × 0.08                                              | 0.06 × 0.03 × 0.02                                              | 0.11 × 0.04 × 0.02                                                               |
| Radiation                                   | CuKα (λ = 1.54184)                                            | CuKα (λ = 1.54184)                                              | MoKα (λ = 0.71073)                                              | MoKα (λ = 0.71073)                                              | MoKα (λ = 0.71075)                                                               |
| 2θ range for data collection/°              | 12.01 to 141.988                                              | 8.898 to 142.27                                                 | 6.656 to 52.744                                                 | 4.202 to 55.088                                                 | 4.386 to 50.05                                                                   |
| Index ranges                                | -8 ≤ h ≤ 9, -6 ≤ k ≤ 9, -29 ≤ l ≤ 33                          | -8 ≤ h ≤ 16, -16 ≤ k ≤ 15, -25 ≤ l ≤ 22                         | -17 ≤ h ≤ 17, -15 ≤ k ≤ 17, -25 ≤ l ≤ 25                        | -8 ≤ h ≤ 8, -15 ≤ k ≤ 15, -17 ≤ l ≤ 17                          | -15 ≤ h ≤ 15, -35 ≤ k ≤ 35, -11 ≤ l ≤ 16                                         |
| Reflections collected                       | 4473                                                          | 11316                                                           | 17739                                                           | 9202                                                            | 56032                                                                            |
| Independent reflections                     | 2808 [R <sub>int</sub> = 0.0221, R <sub>sigma</sub> = 0.0338] | 7041 [R <sub>int</sub> = 0.0193, R <sub>sigma</sub> = 0.0322]   | 7768 [R <sub>int</sub> = 0.0235, R <sub>sigma</sub> = 0.0363]   | 9202 [R <sub>int</sub> = ?, R <sub>sigma</sub> = 0.0373]        | 10159 [R <sub>int</sub> = 0.0745, R <sub>sigma</sub> = 0.0532]                   |
| Data/restraints/parameters                  | 2808/0/209                                                    | 7041/0/512                                                      | 7768/0/512                                                      | 9202/0/298                                                      | 10159/38/795                                                                     |
| Goodness-of-fit on F <sup>2</sup>           | 1.052                                                         | 1.024                                                           | 1.027                                                           | 1.048                                                           | 1.027                                                                            |
| Final R indexes [I ≥ 2σ (I)]                | R <sub>1</sub> = 0.0410, wR <sub>2</sub> = 0.1040             | R <sub>1</sub> = 0.0377, wR <sub>2</sub> = 0.0985               | R <sub>1</sub> = 0.0383, wR <sub>2</sub> = 0.0869               | R <sub>1</sub> = 0.0561, wR <sub>2</sub> = 0.1331               | R <sub>1</sub> = 0.0642, wR <sub>2</sub> = 0.1494                                |
| Final R indexes [all data]                  | R <sub>1</sub> = 0.0482, wR <sub>2</sub> = 0.1111             | R <sub>1</sub> = 0.0458, wR <sub>2</sub> = 0.1060               | R <sub>1</sub> = 0.0536, wR <sub>2</sub> = 0.0953               | R <sub>1</sub> = 0.0760, wR <sub>2</sub> = 0.1424               | R <sub>1</sub> = 0.0809, wR <sub>2</sub> = 0.1589                                |
| Largest diff. peak/hole / e Å <sup>-3</sup> | 0.23/-0.18                                                    | 0.34/-0.29                                                      | 0.33/-0.34                                                      | 0.72/-0.67                                                      | 1.39/-0.62                                                                       |

**Table S2.** Crystal data and structure refinement for compounds 5-9.

| Compound | 5 | 6 | 7 | 8 | 9 |
|----------|---|---|---|---|---|
|----------|---|---|---|---|---|

|                                             |                                                                                  |                                                                                                  |                                                                                                 |                                                                                                    |                                                                                 |
|---------------------------------------------|----------------------------------------------------------------------------------|--------------------------------------------------------------------------------------------------|-------------------------------------------------------------------------------------------------|----------------------------------------------------------------------------------------------------|---------------------------------------------------------------------------------|
| Empirical formula                           | C <sub>45</sub> H <sub>44</sub> ClN <sub>7</sub> Ni <sub>2</sub> O <sub>14</sub> | C <sub>86</sub> H <sub>108</sub> Cl <sub>2</sub> N <sub>12</sub> Ni <sub>4</sub> O <sub>25</sub> | C <sub>86</sub> H <sub>90</sub> Cl <sub>2</sub> N <sub>14</sub> Ni <sub>4</sub> O <sub>21</sub> | C <sub>205</sub> H <sub>227</sub> Cl <sub>3</sub> N <sub>37</sub> Ni <sub>10</sub> O <sub>51</sub> | C <sub>78</sub> H <sub>73</sub> Cu <sub>4</sub> N <sub>15</sub> O <sub>14</sub> |
| Formula weight                              | 1059.74                                                                          | 2015.58                                                                                          | 1961.45                                                                                         | 4718.67                                                                                            | 1698.67                                                                         |
| Temperature/K                               | 173                                                                              | 173                                                                                              | 173                                                                                             | 173                                                                                                | 100(2)                                                                          |
| Crystal system                              | triclinic                                                                        | monoclinic                                                                                       | triclinic                                                                                       | monoclinic                                                                                         | monoclinic                                                                      |
| Space group                                 | P-1                                                                              | P2 <sub>1</sub> /c                                                                               | P-1                                                                                             | P2 <sub>1</sub> /c                                                                                 | C2/c                                                                            |
| a/Å                                         | 13.6630(8)                                                                       | 15.2703(7)                                                                                       | 14.8923(4)                                                                                      | 20.7411(10)                                                                                        | 21.9366(3)                                                                      |
| b/Å                                         | 14.4902(8)                                                                       | 28.8077(12)                                                                                      | 17.0968(7)                                                                                      | 35.8785(14)                                                                                        | 18.2644(3)                                                                      |
| c/Å                                         | 15.6628(8)                                                                       | 22.7473(9)                                                                                       | 17.3958(6)                                                                                      | 18.2934(8)                                                                                         | 18.6976(3)                                                                      |
| α/°                                         | 70.842(5)                                                                        | 90                                                                                               | 87.743(3)                                                                                       | 90                                                                                                 | 90                                                                              |
| β/°                                         | 67.379(5)                                                                        | 107.926(5)                                                                                       | 85.594(2)                                                                                       | 109.654(5)                                                                                         | 103.4839(15)                                                                    |
| γ/°                                         | 68.614(5)                                                                        | 90                                                                                               | 79.606(3)                                                                                       | 90                                                                                                 | 90                                                                              |
| Volume/Å <sup>3</sup>                       | 2600.8(3)                                                                        | 9520.9(7)                                                                                        | 4342.1(3)                                                                                       | 12820.1(10)                                                                                        | 7284.83(19)                                                                     |
| Z                                           | 2                                                                                | 4                                                                                                | 2                                                                                               | 2                                                                                                  | 4                                                                               |
| ρ <sub>calc</sub> /cm <sup>3</sup>          | 1.353                                                                            | 1.406                                                                                            | 1.500                                                                                           | 1.222                                                                                              | 1.549                                                                           |
| μ/mm <sup>1</sup>                           | 0.842                                                                            | 2.059                                                                                            | 2.216                                                                                           | 1.666                                                                                              | 1.231                                                                           |
| F(000)                                      | 1096.0                                                                           | 4216.0                                                                                           | 2036.0                                                                                          | 4910.0                                                                                             | 3496.0                                                                          |
| Crystal size/mm <sup>3</sup>                | 0.16 × 0.12 × 0.07                                                               | 0.24 × 0.18 × 0.12                                                                               | 0.2 × 0.14 × 0.1                                                                                | 0.15 × 0.12 × 0.1                                                                                  | 0.13 × 0.12 × 0.07                                                              |
| Radiation                                   | MoKα (λ = 0.71073)                                                               | CuKα (λ = 1.54184)                                                                               | CuKα (λ = 1.54184)                                                                              | CuKα (λ = 1.54184)                                                                                 | MoKα (λ = 0.71075)                                                              |
| 2θ range for data collection/°              | 6.582 to 58.486                                                                  | 8.858 to 142.198                                                                                 | 9.206 to 142.514                                                                                | 9.268 to 133.2                                                                                     | 4.46 to 54.966                                                                  |
| Index ranges                                | -17 ≤ h ≤ 18, -16 ≤ k ≤ 19, -21 ≤ l ≤ 20                                         | -17 ≤ h ≤ 18, -34 ≤ k ≤ 34, -23 ≤ l ≤ 26                                                         | -14 ≤ h ≤ 18, -20 ≤ k ≤ 20, -21 ≤ l ≤ 19                                                        | -19 ≤ h ≤ 25, -43 ≤ k ≤ 37, -22 ≤ l ≤ 15                                                           | -28 ≤ h ≤ 28, -23 ≤ k ≤ 23, -21 ≤ l ≤ 24                                        |
| Reflections collected                       | 16964                                                                            | 32761                                                                                            | 27717                                                                                           | 43617                                                                                              | 24167                                                                           |
| Independent reflections                     | 11603 [R <sub>int</sub> = 0.0449, R <sub>sigma</sub> = 0.1063]                   | 17467 [R <sub>int</sub> = 0.0335, R <sub>sigma</sub> = 0.0513]                                   | 15772 [R <sub>int</sub> = 0.0489, R <sub>sigma</sub> = 0.0634]                                  | 22143 [R <sub>int</sub> = 0.0749, R <sub>sigma</sub> = 0.1218]                                     | 8316 [R <sub>int</sub> = 0.0166, R <sub>sigma</sub> = 0.0184]                   |
| Data/restraints/parameters                  | 11603/3/631                                                                      | 17467/145/1174                                                                                   | 15772/0/1163                                                                                    | 22143/62/1401                                                                                      | 8316/24/517                                                                     |
| Goodness-of-fit on F <sup>2</sup>           | 0.978                                                                            | 1.085                                                                                            | 1.053                                                                                           | 1.016                                                                                              | 1.039                                                                           |
| Final R indexes [I >= 2σ (I)]               | R <sub>1</sub> = 0.0677, wR <sub>2</sub> = 0.1560                                | R <sub>1</sub> = 0.0754, wR <sub>2</sub> = 0.2190                                                | R <sub>1</sub> = 0.0529, wR <sub>2</sub> = 0.1308                                               | R <sub>1</sub> = 0.0902, wR <sub>2</sub> = 0.2336                                                  | R <sub>1</sub> = 0.0280, wR <sub>2</sub> = 0.0739                               |
| Final R indexes [all data]                  | R <sub>1</sub> = 0.1176, wR <sub>2</sub> = 0.1810                                | R <sub>1</sub> = 0.0941, wR <sub>2</sub> = 0.2432                                                | R <sub>1</sub> = 0.0639, wR <sub>2</sub> = 0.1419                                               | R <sub>1</sub> = 0.1445, wR <sub>2</sub> = 0.2680                                                  | R <sub>1</sub> = 0.0320, wR <sub>2</sub> = 0.0760                               |
| Largest diff. peak/hole / e Å <sup>-3</sup> | 1.18/-0.68                                                                       | 1.29/-0.88                                                                                       | 0.68/-0.78                                                                                      | 1.34/-0.98                                                                                         | 0.50/-0.56                                                                      |

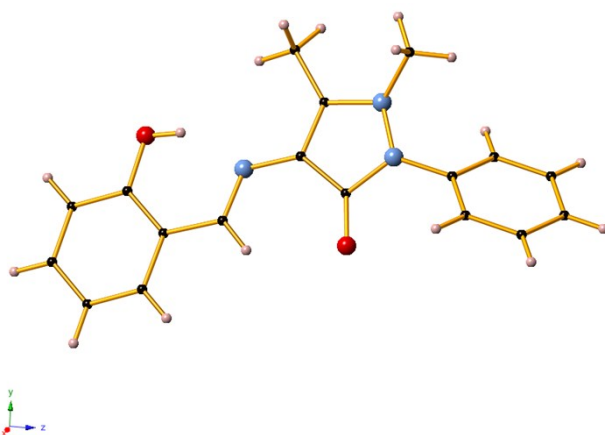

**Figure S1.** The crystal structure of the ligand HL. Colour code C (black), H (pink), O (red), N (blue).

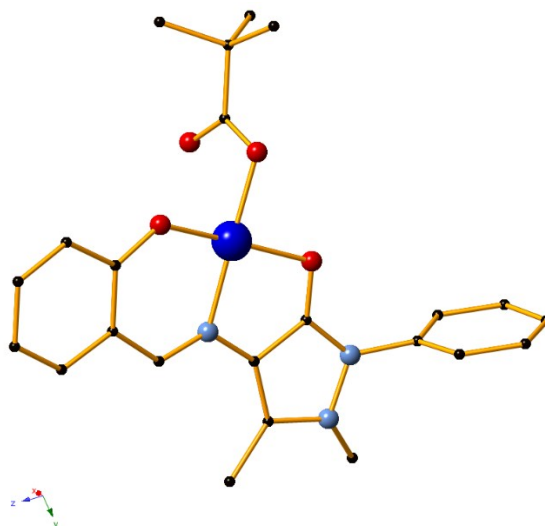

**Figure S2.** The structure of compound **3**. Lattice solvent molecules and H atoms are omitted for clarity. Colour code Cu (dark blue), O (red), C (black), N (blue).

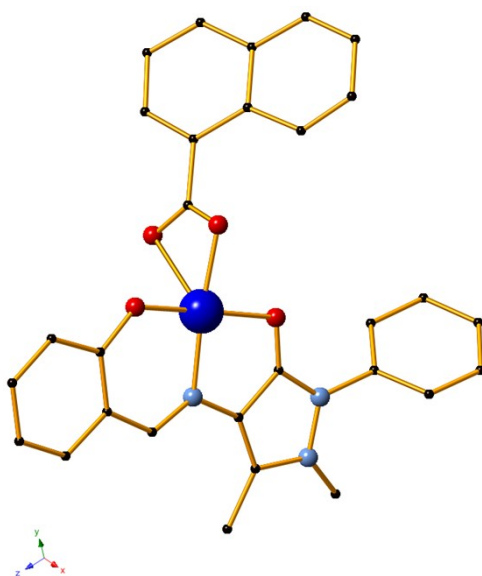

**Figure S3.** The monomer structure in compound **4**. Lattice solvent and anion molecules as well as H atoms are omitted for clarity. Colour code Cu (dark blue), O (red), C (black), N (blue).

**Table S3.** Selected bond distances (Å) for compound **1**.

|          |            |
|----------|------------|
| Ni1 – O2 | 2.0021(13) |
| Ni1 – O1 | 2.2037(12) |
| Ni1 – O3 | 2.1959(12) |

|          |            |
|----------|------------|
| Ni1 – O4 | 2.0054(13) |
| Ni1 – N3 | 2.0384(14) |
| Ni1 – N6 | 2.0417(14) |

**Table S4.** Selected bond distances (Å) for compound **2**.

|          |            |
|----------|------------|
| Co1 – O1 | 2.0055(14) |
| Co1 – O2 | 2.2183(14) |
| Co1 – O3 | 2.2314(14) |
| Co1 – O4 | 2.0022(14) |
| Co1 – N1 | 2.0860(15) |
| Co1 – N4 | 2.0959(15) |

**Table S5.** Selected bond distances (Å) for compound **3**.

|          |          |
|----------|----------|
| Cu1 – O1 | 1.896(2) |
| Cu1 – O2 | 1.999(2) |
| Cu1 – O3 | 1.930(2) |
| Cu1 – N1 | 1.967(3) |

**Table S6.** Hydrogen bond values for compound **3**.

| D–H···A                     | D–H [Å] | H···A [Å] | D···A [Å] | D–H···A [°] |
|-----------------------------|---------|-----------|-----------|-------------|
| O101–H10A···N4              | 0.85    | 2.01      | 2.849(4)  | 171         |
| O101–H10B···O1 <sup>i</sup> | 0.85    | 2.11      | 2.912(3)  | 157         |

i: -1+x,+y,+z

**Table S7.** Selected bond distances (Å) for compound **4**.

|          |          |
|----------|----------|
| Cu1 – O1 | 1.906(6) |
| Cu1 – O2 | 2.019(5) |
| Cu1 – O3 | 1.972(6) |
| Cu1 – O4 | 2.502(8) |
| Cu1 – N1 | 1.962(6) |

|             |          |
|-------------|----------|
| Cu11 – O101 | 1.911(5) |
| Cu11 – O102 | 1.999(5) |
| Cu11 – O103 | 1.973(6) |
| Cu11 – O104 | 2.473(7) |
| Cu11 – N101 | 1.970(7) |

**Table S8.** Hydrogen bond values for compound **4**.

| D–H···A          | D–H [Å] | H···A [Å] | D···A [Å] | D–H···A [°] |
|------------------|---------|-----------|-----------|-------------|
| O401–H40A···O303 | 0.85    | 2.02      | 2.806(15) | 153         |
| O401–H40B···O101 | 0.85    | 2.13      | 2.885(11) | 147         |
| N201–H201···O401 | 1.00    | 1.79      | 2.742(13) | 158         |

**Table S9.** Selected bond distances (Å) for compound **5**.

|           |           |
|-----------|-----------|
| Ni1 – Ni2 | 2.9457(7) |
| Ni1 – O1  | 2.112(3)  |
| Ni1 – O2  | 2.020(3)  |
| Ni1 – O4  | 2.069(3)  |
| Ni1 – O5  | 2.035(3)  |
| Ni1 – O9  | 2.068(3)  |
| Ni1 – N3  | 2.047(3)  |
| Ni2 – O2  | 2.100(3)  |
| Ni2 – O3  | 2.140(3)  |
| Ni2 – O4  | 1.983(3)  |
| Ni2 – O6  | 2.025(3)  |
| Ni2 – O10 | 2.075(3)  |
| Ni2 – N6  | 2.025(3)  |

**Table S10.** Selected bond distances (Å) and angles (°) for **6**.

|             |          |             |          |                |            |
|-------------|----------|-------------|----------|----------------|------------|
| Ni01 – O00C | 1.968(3) | Ni03 – O009 | 2.103(3) | Ni02–O00A–Ni03 | 104.52(11) |
| Ni01 – O00D | 2.137(3) | Ni03 – N00E | 2.038(3) | Ni02–O00A–Ni04 | 99.77(12)  |

|             |          |                |            |                |            |
|-------------|----------|----------------|------------|----------------|------------|
| Ni01 – O00I | 2.217(3) | Ni04 – O00A    | 2.040(3)   | Ni03–O00A–Ni04 | 101.55(12) |
| Ni01 – O007 | 2.033(3) | Ni04 – O00C    | 2.033(3)   | Ni03–O00C–Ni04 | 100.55(11) |
| Ni01 – O008 | 2.048(3) | Ni04 – O00G    | 1.997(3)   | Ni01 – Ni02    | 3.1734(8)  |
| Ni01 – N00K | 2.014(3) | Ni04 – O00I    | 2.196(3)   | Ni01 – Ni03    | 3.1229(11) |
| Ni02 – O00A | 1.989(3) | Ni04 – O00L    | 2.126(3)   | Ni01 – Ni04    | 3.1352(9)  |
| Ni02 – O00B | 2.100(3) | Ni04 – N00J    | 2.051(4)   | Ni02 – Ni03    | 3.1781(10) |
| Ni02 – O00F | 2.055(3) | Ni01–O00I–Ni02 | 95.26(11)  | Ni02 – Ni04    | 3.0821(9)  |
| Ni02 – O00I | 2.077(3) | Ni01–O00C–Ni03 | 101.40(12) | Ni03 – Ni04    | 3.1528(10) |
| Ni02 – O007 | 2.136(3) | Ni01–O007–Ni02 | 99.09(12)  |                |            |
| Ni02 – N00T | 2.036(3) | Ni01–O00I–Ni04 | 90.55(11)  |                |            |
| Ni03 – O00A | 2.029(3) | Ni01–O007–Ni03 | 91.76(10)  |                |            |
| Ni03 – O00C | 2.066(3) | Ni01–O00C–Ni04 | 103.17(14) |                |            |
| Ni03 – O00H | 1.973(3) | Ni02–O007–Ni03 | 91.19(9)   |                |            |
| Ni03 – O007 | 2.309(3) | Ni02–O00I–Ni04 | 92.27(11)  |                |            |

**Table S11.** Hydrogen bond values for compound **6**.

| D–H···A          | D–H [Å]   | H···A [Å] | D···A [Å] | D–H···A [°] |
|------------------|-----------|-----------|-----------|-------------|
| O00C–H00C···O01H | 1.00      | 1.86      | 2.845(6)  | 169         |
| O00L–H00L···O00D | 0.851(16) | 2.230(17) | 2.991(4)  | 149(3)      |
| O009–H009···O00G | 0.86(3)   | 1.88(4)   | 2.647(5)  | 147(4)      |
| O01H–H01I···O032 | 0.84      | 2.12      | 2.852(16) | 145         |

**Table S12.** Selected bond distances (Å) and angles (°) for **7**.

|             |            |             |            |                |           |
|-------------|------------|-------------|------------|----------------|-----------|
| Ni01 – O008 | 2.1113(18) | Ni03 – O00G | 2.089(2)   | Ni02–O007–Ni03 | 100.29(8) |
| Ni01 – O009 | 2.1566(19) | Ni03 – N00J | 2.054(2)   | Ni02–O007–Ni04 | 89.27(7)  |
| Ni01 – O00A | 2.0571(19) | Ni04 – O007 | 2.1177(19) | Ni03–O008–Ni04 | 99.93(8)  |
| Ni01 – O00E | 2.014(2)   | Ni04 – O008 | 2.1448(19) | Ni03–O007–Ni04 | 98.85(8)  |
| Ni01 – O00I | 2.094(2)   | Ni04 – O009 | 2.0548(18) | Ni01 – Ni02    | 3.2167(6) |

|             |            |                |            |             |           |
|-------------|------------|----------------|------------|-------------|-----------|
| Ni01 – N00O | 2.053(2)   | Ni04 – O00C    | 2.013(2)   | Ni01 – Ni03 | 2.9575(6) |
| Ni02 – O007 | 2.0648(18) | Ni04 – O00F    | 2.0961(19) | Ni01 – Ni04 | 3.2278(6) |
| Ni02 – O009 | 2.1099(19) | Ni04 – N00L    | 2.049(2)   | Ni02 – Ni03 | 3.2253(6) |
| Ni02 – O00A | 2.1530(19) | Ni01–O009–Ni02 | 97.86(8)   | Ni02 – Ni04 | 2.9388(7) |
| Ni02 – O00B | 1.999(2)   | Ni01–O00A–Ni03 | 90.38(7)   | Ni03 – Ni04 | 3.2309(7) |
| Ni02 – O00H | 2.062(2)   | Ni01–O00A–Ni02 | 99.62(8)   |             |           |
| Ni02 – N00K | 2.056(2)   | Ni01–O009–Ni04 | 100.05(8)  |             |           |
| Ni03 – O007 | 2.1361(19) | Ni01–O008–Ni03 | 89.91(7)   |             |           |
| Ni03 – O008 | 2.0746(19) | Ni01–O008–Ni04 | 98.65(7)   |             |           |
| Ni03 – O00A | 2.1113(18) | Ni02–O00A–Ni03 | 98.28(7)   |             |           |
| Ni03 – O00D | 1.999(2)   | Ni02–O009–Ni04 | 89.75(7)   |             |           |

**Table S13.** Hydrogen bond values for compound **7**.

| D–H···A          | D–H [Å] | H···A [Å] | D···A [Å] | D–H···A [°] |
|------------------|---------|-----------|-----------|-------------|
| O00W–H00A···O00X | 0.85    | 2.24      | 3.059(5)  | 160         |
| O00W–H00B···N02Z | 0.85    | 2.15      | 2.993(6)  | 170         |

**Table S14.** Selected bond distances (Å) and angles (°) for **8**.

|      |      |          |      |      |          |            |
|------|------|----------|------|------|----------|------------|
| Ni01 | O008 | 2.117(4) | Ni04 | O00S | 2.185(5) |            |
| Ni01 | O00A | 2.049(4) | Ni04 | N00X | 2.021(6) |            |
| Ni01 | O00D | 2.075(4) | Ni05 | O00C | 2.068(5) |            |
| Ni01 | O00G | 2.105(4) | Ni05 | O00D | 2.081(4) |            |
| Ni01 | O1   | 2.057(4) | Ni05 | O00G | 2.021(4) |            |
| Ni01 | N00N | 2.089(4) | Ni05 | O00J | 2.006(5) |            |
| Ni02 | O009 | 2.139(4) | Ni05 | O00K | 2.238(5) |            |
| Ni02 | O00A | 2.115(4) | Ni05 | N00Y | 2.035(5) |            |
| Ni02 | O00B | 2.141(4) | Ni01 | O00A | Ni02     | 96.41(16)  |
| Ni02 | O00C | 2.027(4) | Ni01 | O00D | Ni05     | 98.23(15)  |
| Ni02 | O00D | 1.990(4) | Ni02 | O00C | Ni05     | 96.68(18)  |
| Ni02 | N019 | 2.009(6) | Ni02 | O00D | Ni01     | 99.57(17)  |
| Ni03 | O008 | 2.010(4) | Ni02 | O00D | Ni05     | 97.42(16)  |
| Ni03 | O00E | 2.089(4) | Ni03 | O1   | Ni01     | 98.18(17)  |
| Ni03 | O00F | 2.207(4) | Ni03 | O1   | Ni04     | 100.36(17) |
| Ni03 | O1   | 2.002(4) | Ni04 | O1   | Ni01     | 100.49(18) |
| Ni03 | O00I | 2.119(4) | Ni04 | O00I | Ni03     | 95.37(16)  |

|      |      |          |      |      |      |           |
|------|------|----------|------|------|------|-----------|
| Ni03 | N00O | 2.036(5) | Ni04 | O00G | Ni01 | 97.06(16) |
| Ni04 | O00G | 2.064(4) | Ni05 | O00G | Ni01 | 99.15(16) |
| Ni04 | O1   | 2.006(4) | Ni05 | O00G | Ni04 | 98.28(19) |
| Ni04 | O00I | 2.043(4) | Ni05 | O00J | Ni04 | 96.39(19) |
| Ni04 | O00J | 2.138(4) |      |      |      |           |

---



**Table S15.** Selected bond distances (Å) and angles (°) for **9**.

|                        |            |                         |           |
|------------------------|------------|-------------------------|-----------|
| Cu1 – O1               | 1.9197(12) | O1–Cu1–O5               | 83.46(5)  |
| Cu1 – O3               | 1.9696(12) | O5 <sup>i</sup> –Cu1–O5 | 78.85(4)  |
| Cu1 – O5               | 2.0012(12) | O5 <sup>i</sup> –Cu1–O1 | 96.68(5)  |
| Cu1 – O7               | 2.4865(13) | O5 <sup>i</sup> –Cu1–O3 | 75.22(4)  |
| Cu1 – O5 <sup>i</sup>  | 2.5227(12) | O5 <sup>i</sup> –Cu1–N1 | 107.83(5) |
| Cu1 – N1               | 1.9718(15) | O3–Cu1–N1               | 95.57(6)  |
| Cu2 – O1               | 2.3579(13) | O1–Cu1–N1               | 94.57(6)  |
| Cu2 – O3 <sup>i</sup>  | 2.0341(12) | O3 <sup>i</sup> –Cu2–O5 | 88.46(5)  |
| Cu2 – O5               | 1.9451(12) | O3 <sup>i</sup> –Cu2–O1 | 90.51(4)  |
| Cu2 – O4               | 1.8781(12) | O4–Cu2–O1               | 102.44(5) |
| Cu2 – N4               | 1.9450(13) | O4–Cu2–O3 <sup>i</sup>  | 95.19(5)  |
| C27 – O5               | 1.3857(19) | O4–Cu2–O5               | 174.96(5) |
| C27 – O6               | 1.4042(19) | O4–Cu2–N4               | 95.83(6)  |
| C28 – O7               | 1.229(2)   | O5–Cu2–O1               | 74.00(4)  |
| Cu1 – Cu2              | 3.1319(6)  | N4–Cu2–O1               | 125.79(5) |
| Cu1 – Cu1 <sup>i</sup> | 3.5100(9)  | N4–Cu2–O3 <sup>i</sup>  | 138.26(5) |
| Cu1 – Cu2 <sup>i</sup> | 3.1696(5)  | N4–Cu2–O5               | 83.67(5)  |
| O3–Cu1–O5              | 87.04(5)   |                         |           |

i: 3/2-x,3/2-y,1-z

**Table S16.** Hydrogen bond values for compound **9**.

| D–H ··· A  | D–H [Å] | H ··· A [Å] | D ··· A [Å] | D–H ··· A [°] |
|------------|---------|-------------|-------------|---------------|
| O6–H6···O3 | 0.84    | 1.98        | 2.7510(16)  | 151           |

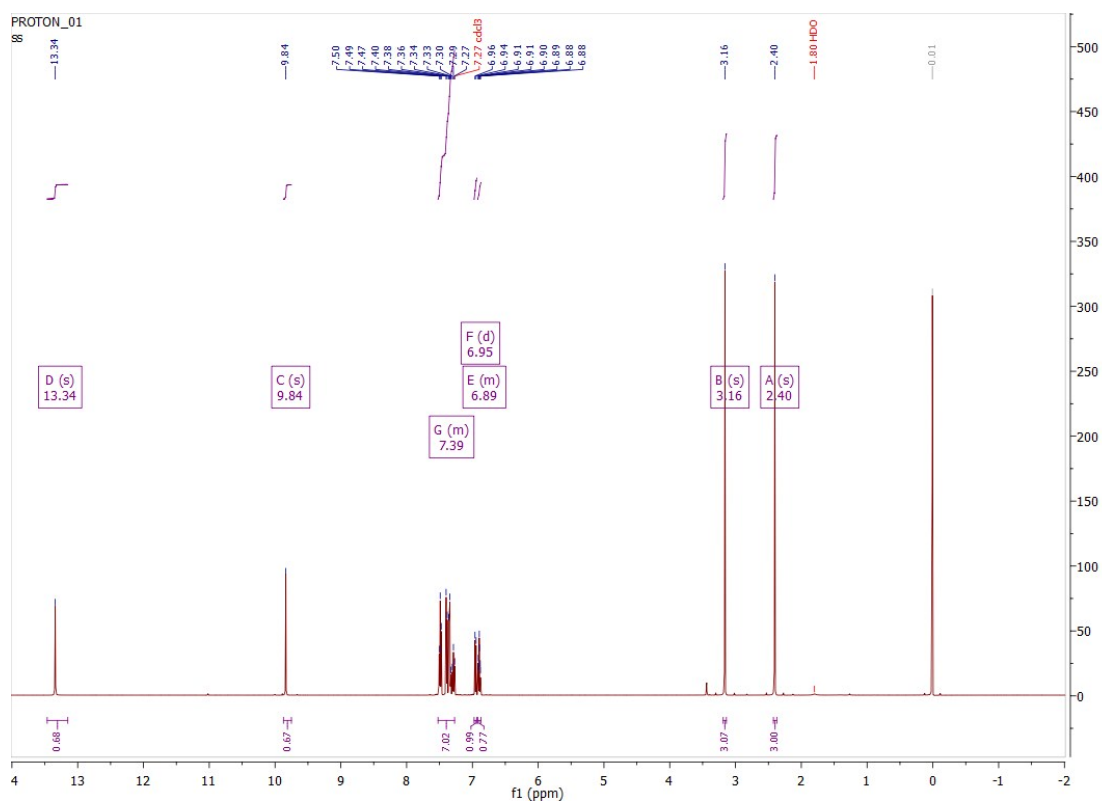

Figure S4. <sup>1</sup>H NMR spectrum of HL<sup>1</sup>.

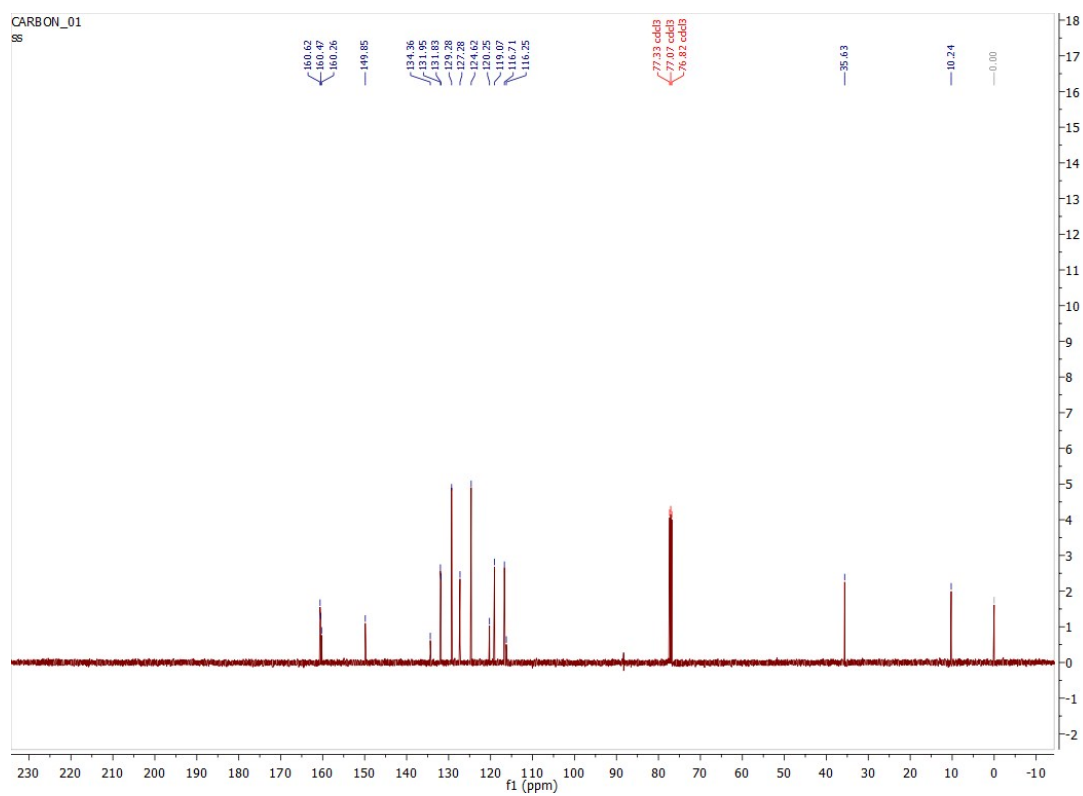

**Figure S5.**  $^{13}\text{C}$ NMR spectrum of HL<sup>1</sup>.

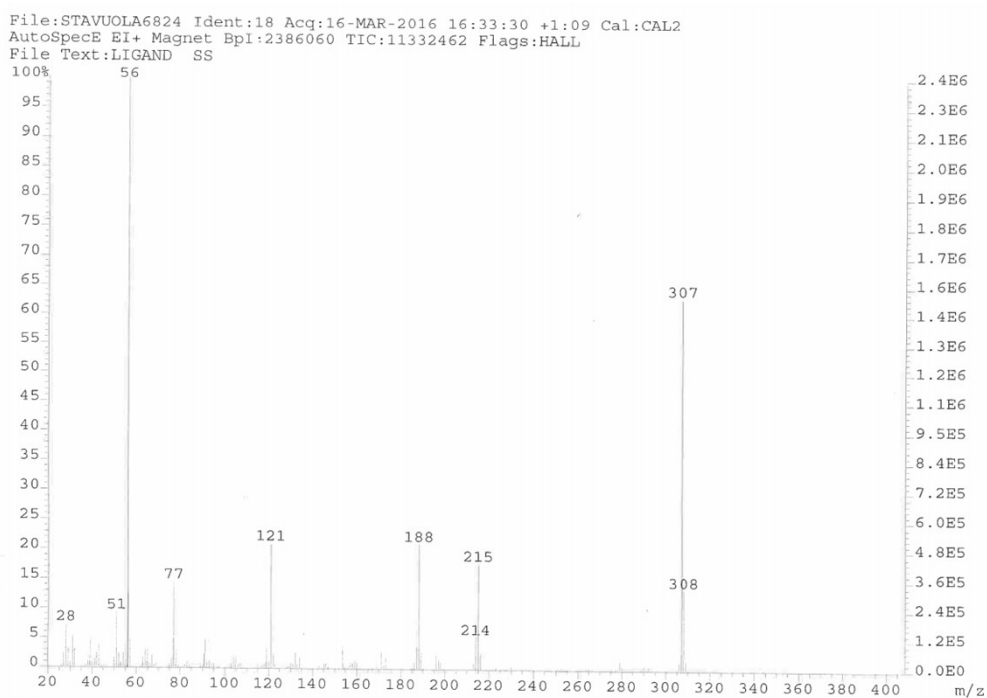

**Figure S6.** EI spectrum for HL<sup>1</sup>.

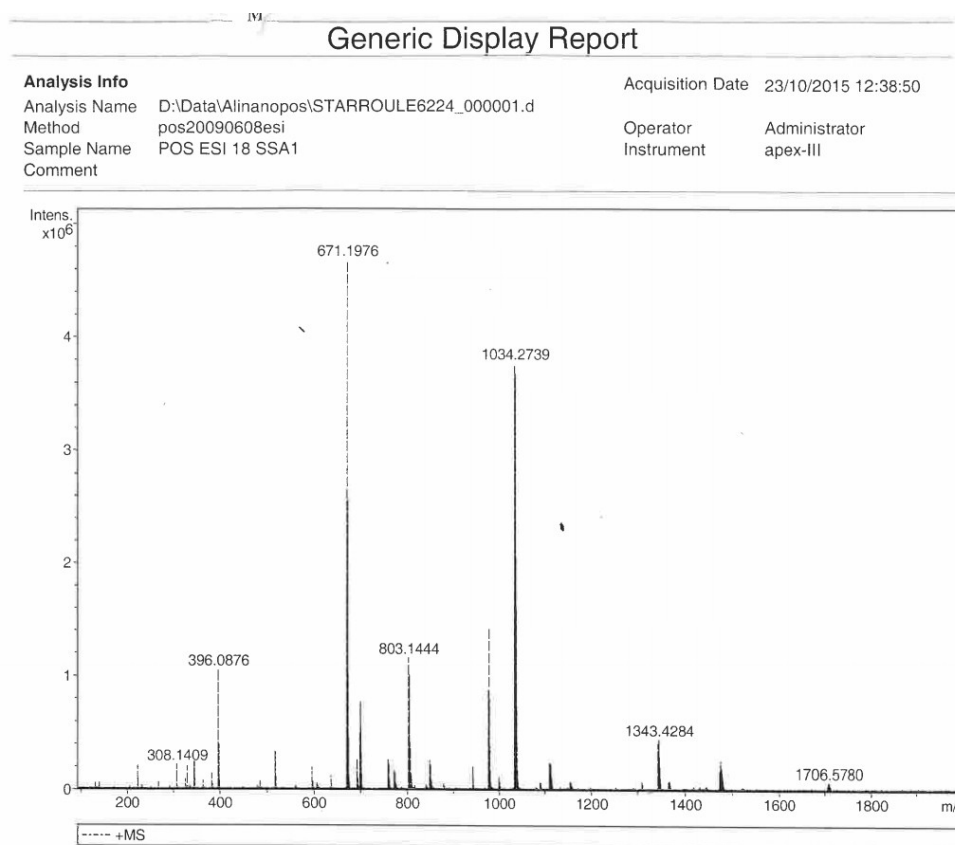

**Figure S7.** ESI-MS data for compound **1**.

### Generic Display Report

**Analysis Info**  
Analysis Name D:\Data\Alinanopos\STAVROULA6476\_000001.d Acquisition Date 16/12/2015 14:23:14  
Method pos20090608esi Operator Administrator  
Sample Name POS ESI 18 SS ALCOL BROWN CRYSTALS Instrument apex-III  
Comment

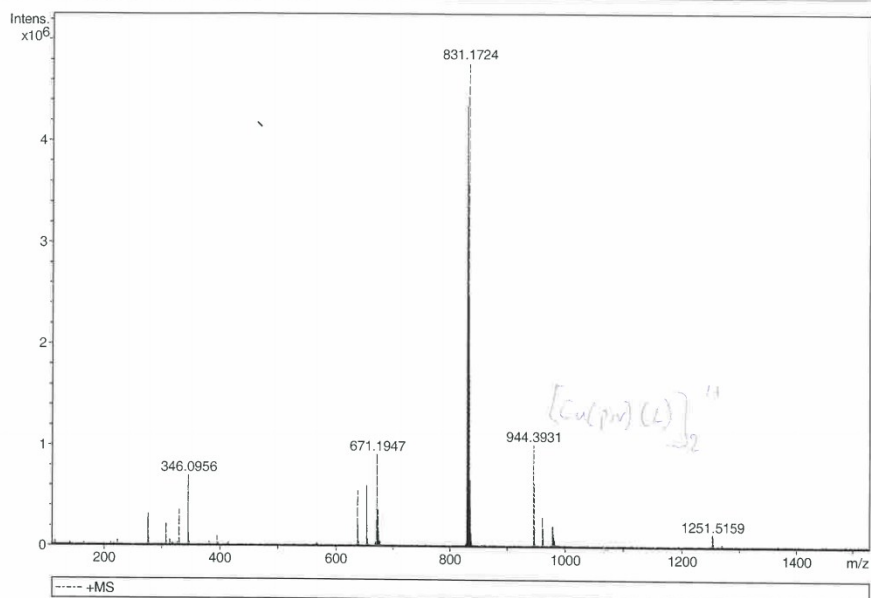

**Figure S8.** ESI-MS data for compound 3.

### Generic Display Report

**Analysis Info**  
Analysis Name D:\Data\Alinanopos\STAVROULA6430\_000001.d Acquisition Date 07/12/2015 17:08:39  
Method pos20090608esi Operator Administrator  
Sample Name POS ESI 12SSELCOL Instrument apex-III  
Comment

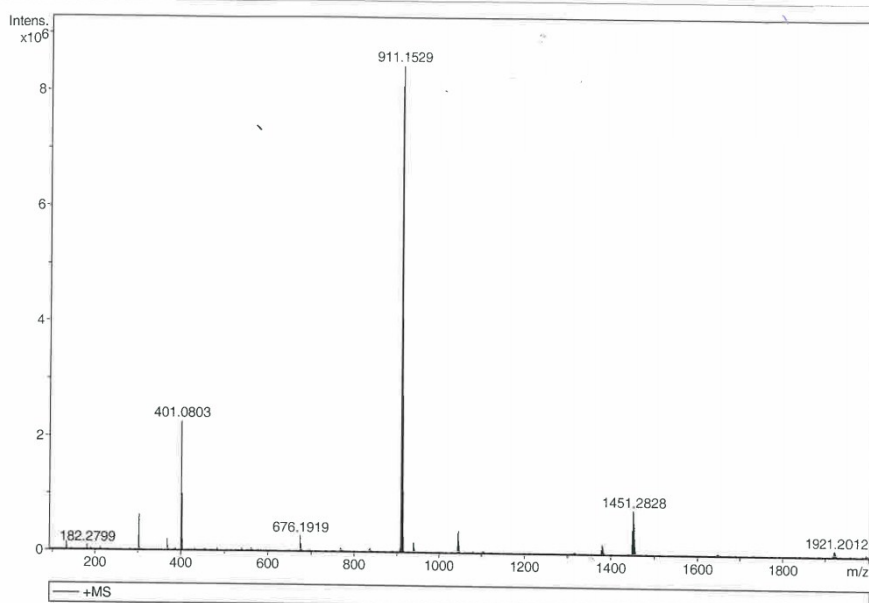

**Figure S9.** ESI-MS data for compound 4.

### Generic Display Report

**Analysis Info**  
Analysis Name D:\Data\Alinanopos\STAVROULA6429\_000001.d Acquisition Date 07/12/2015 17:10:50  
Method pos20090608esi Operator Administrator  
Sample Name POS ESI 10SSDLCOL Instrument apex-III  
Comment

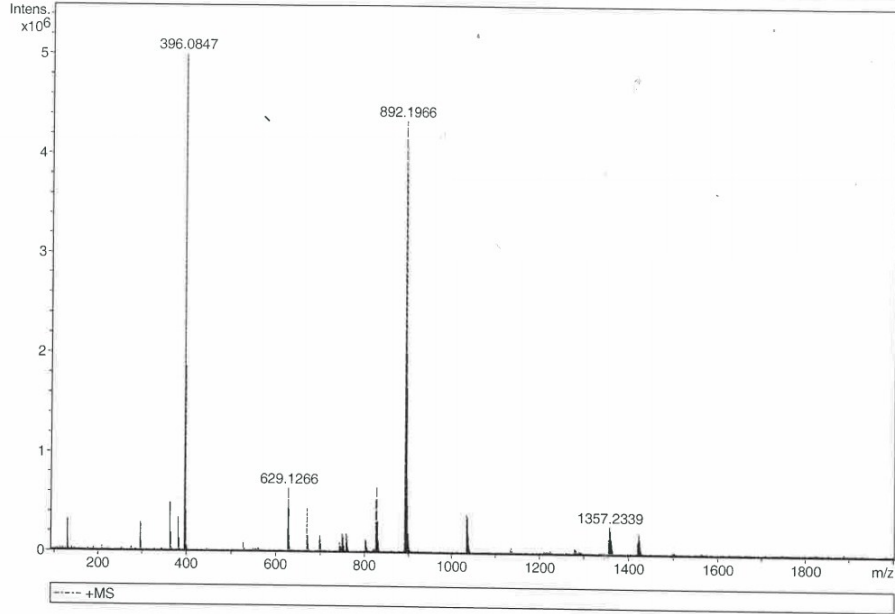

Figure S10. ESI-MS data for compound 5.

### Generic Display Report

**Analysis Info**  
Analysis Name D:\Data\Alinanopos\STAVVOULA6268\_000001.d Acquisition Date 05/11/2015 11:55:10  
Method pos20090608esi Operator Administrator  
Sample Name POS ESI 6SSALCOL Instrument apex-III  
Comment

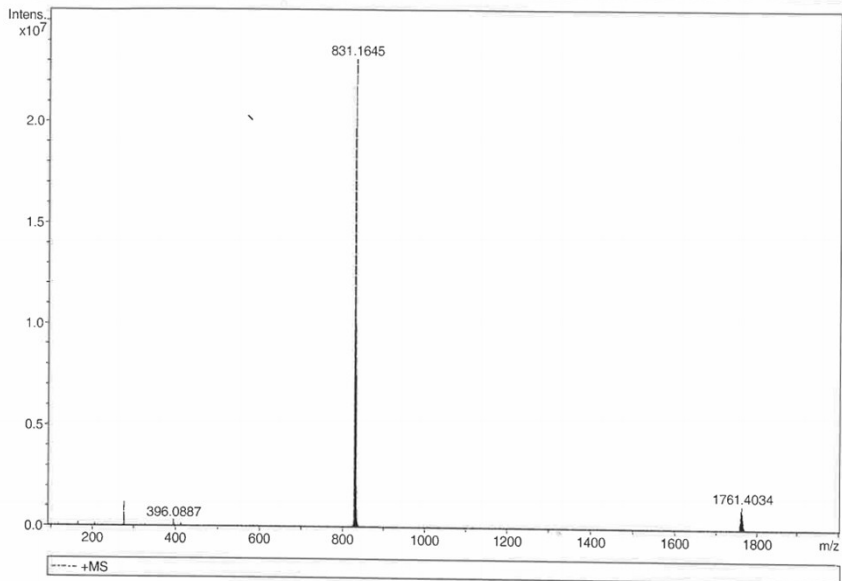

Figure S11. ESI-MS data for compound 6.

## Generic Display Report

### Analysis Info

Analysis Name D:\Data\Alinanopos\STAVROULA6320\_000001.d  
Method pos20090608esi  
Sample Name POS ESI 18SSA LCOL  
Comment

Acquisition Date 23/11/2015 13:51:36

Operator Administrator  
Instrument apex-III

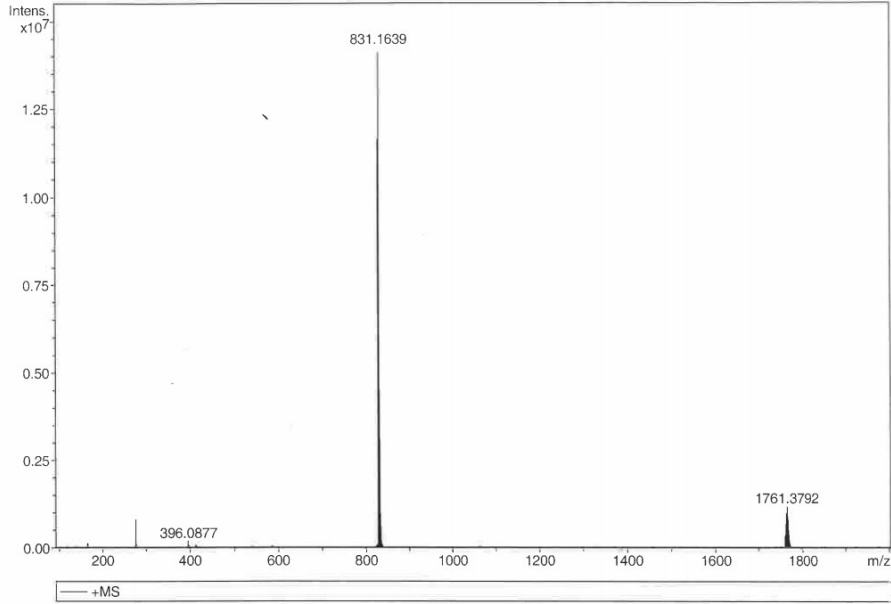

Figure S12. ESI-MS data for compound 7.

## Generic Display Report

### Analysis Info

Analysis Name D:\Data\Alinanopos\MOHD5919\_000001.d  
Method pos20090608esi  
Sample Name POS ESI A-5  
Comment

Acquisition Date 09/07/2015 10:34:23

Operator Administrator  
Instrument apex-III

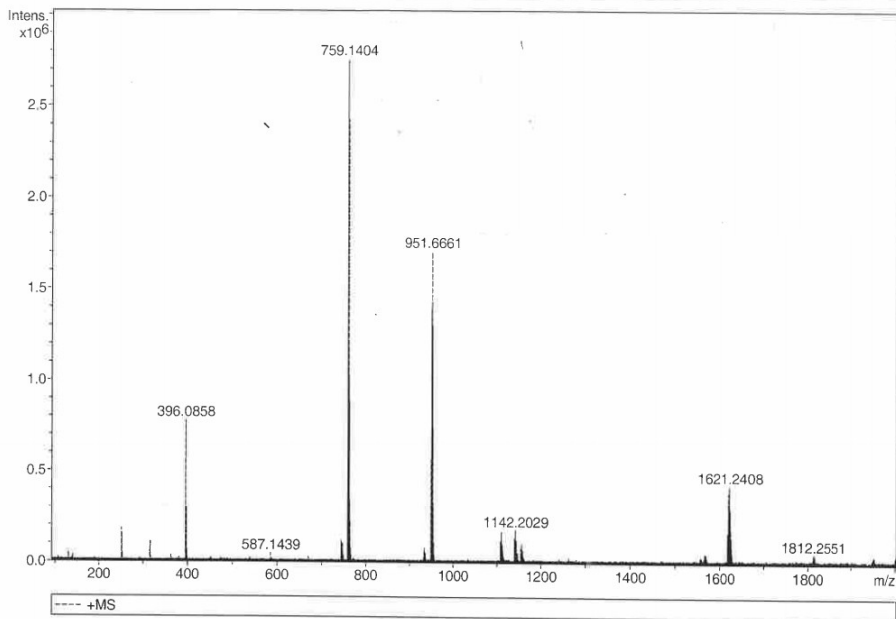

Figure S13. ESI-MS data for compound 8.

## Generic Display Report

### Analysis Info

Analysis Name D:\Data\Alinanopos\STAVROULA6432\_000001.d  
Method pos20090608esi  
Sample Name POS ESI 18SSALCOL CU  
Comment

Acquisition Date 07/12/2015 17:12:56

Operator Administrator  
Instrument apex-III

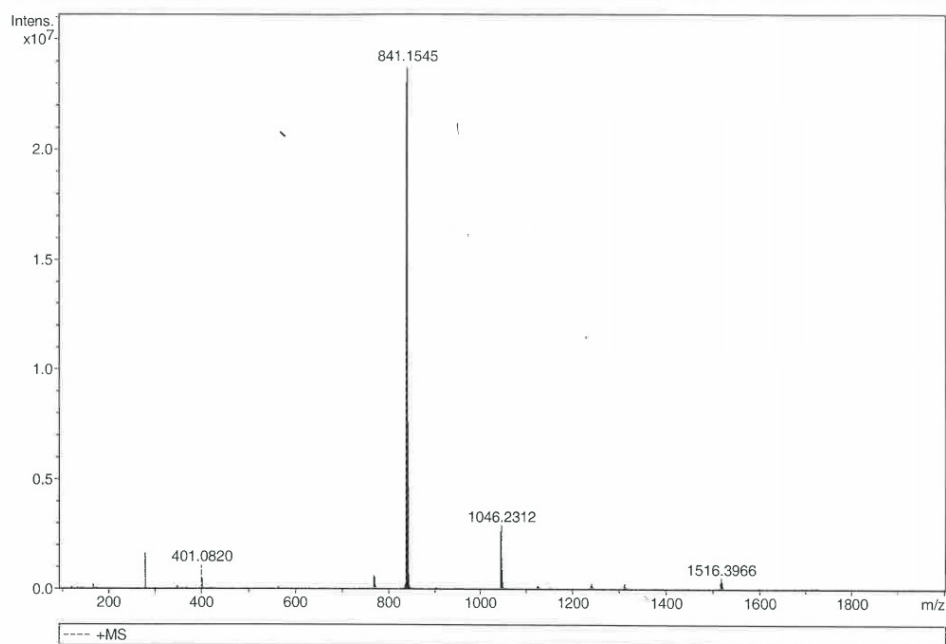

**Figure S14.** ESI-MS data for compound **9**.

**Complete list of ref. 82.** Frisch, M. J.; Trucks, G. W.; Schlegel, H. B.; Scuseria, G. E.; Robb, M. A.; Cheeseman, J. R.; Scalmani, G.; Barone, V.; Mennucci, B.; Petersson, G. A.; Nakatsuji, H.; Caricato, M.; Li, X.; Hratchian, H. P.; Izmaylov, A. F.; Bloino, J.; Zheng, G.; Sonnenberg, J. L.; Hada, M.; Ehara, M.; Toyota, K.; Fukuda, R.; Hasegawa, J.; Ishida, M.; Nakajima, T.; Honda, Y.; Kitao, O.; Nakai, H.; Vreven, T.; Montgomery, J. A., Jr.; Peralta, J. E.; Ogliaro, F.; Bearpark, M.; Heyd, J. J.; Brothers, E.; Kudin, K. N.; Staroverov, V. N.; Kobayashi, R.; Normand, J.; Raghavachari, K.; Rendell, A.; Burant, J. C.; Iyengar, S. S.; Tomasi, J.; Cossi, M.; Rega, N.; Millam, M. J.; Klene, M.; Knox, J. E.; Cross, J. B.; Bakken, V.; Adamo, C.; Jaramillo, J.; Gomperts, R.; Stratmann, R. E.; Yazyev, O.; Austin, A. J.; Cammi, R.; Pomelli, C.; Ochterski, J. W.; Martin, R. L.; Morokuma, K.; Zakrzewski, V. G.; Voth, G. A.; Salvador, P.; Dannenberg, J. J.; Dapprich, S.; Daniels, A. D.; Farkas, Ö.; Foresman, J. B.; Ortiz, J. V.; Cioslowski, J.; Fox, D. J. Gaussian 09, Revision D.01; Gaussian, Inc.: Wallingford CT 2010.

**Computational Details.** All calculations were performed using the Gaussian09, D.01 program suite. The geometries and thermal corrections for all stationary points along the reaction coordinate are computed with the Perdew, Burke and Ernzerhof<sup>1,2</sup> of hybrid density functional denoted as PBE0 (also called PBE1PBE) as implemented in the Gaussian09 program suite. The selection of the PBE0

functional was based on the fact that PBE0 generally gives the best results for various properties of transition metal, lanthanide, actinide, and main group elements compounds.<sup>3-5</sup> For the geometry optimizations we have used the Def2-TZVP basis set.<sup>6</sup> Hereafter the method used in DFT calculations is abbreviated as PBE0/Def2-TZVP. Frequency calculations were also performed at the same level of theory to identify whether the stationary point is a local minimum or a transition state. The transition states were confirmed by IRC calculations and each had only one imaginary frequency. For the open shell systems unrestricted wavefunctions have been used. The computed electronic energies were corrected to constant pressure and 298 K, for zero point energy (ZPE) differences and for the contributions of the translational, rotational and vibrational partition functions. The natural bond orbital (NBO) population analysis was performed using Weinhold's methodology as implemented in the NBO 6.0 software.<sup>7,8</sup> All calculations were performed in vacuum and in solution (acetonitrile solvent) employing the Polarizable Continuum Model (PCM) using the integral equation formalism variant (IEFPCM) being the default self-consistent reaction field (SCRF) method.<sup>9</sup>

## References

- (1) Ernzerhof, M.; Scuseria, G. E. Assessment of the Perdew-Burke-Ernzerhof exchange-correlation functional. *J. Chem. Phys.* **1999**, 110 (11), 5029-5036.
- (2) Vetere, V.; Adamo, C.; Maldivi, P. Performance of the 'parameter free' PBE0 functional for the modeling of molecular properties of heavy metals. *Chem. Phys. Lett.* **2000**, 325 (1-3), 99-105.
- (3) Vetere, V.; Adamo, C.; Maldivi, P., *Chem. Phys. Lett.* **2000**, 325, 99.
- (4) Graciani, J.; Márquez, A. M.; Plata, J. J.; Ortega, Y.; Hernández, N. C.; Meyer, A.; Zicovich-Wilson, C. M.; Sanz, J. F., *J. Chem. Theory Comput.* **2011**, 7, 56.
- (5) Zahn, S.; Kirchner, B., *J. Phys. Chem. A* **2008**, 112, 8430.
- (7) Vlaisavljevich, B.; Mir, P.; Cramer, C. J.; Gagliardi, L.; Infante, I.; Liddle, S. T., *Chem. Eur. J.* **2011**, 17, 8424.
- (7) Weigend, F.; Ahlrichs, R. Balanced basis sets of split valence, triple zeta valence and quadruple zeta valence quality for H to Rn: Design and assessment of accuracy. *PCCP* **2005**, 7 (18), 3297-3305 DOI: 10.1039/b508541a.
- (8) **NBO 6.0**. E. D. Glendening, J. K. Badenhoop, A. E. Reed, J. E. Carpenter, J. A. Bohmann, C. M. Morales, C. R. Landis, and F. Weinhold, Theoretical Chemistry Institute, University of Wisconsin, Madison (2013).
- (9) Tomasi, J.; Mennucci, B.; Cammi, R. Quantum mechanical continuum solvation models. *Chem. Rev.* **2005**, 105 (8), 2999-3093 DOI: 10.1021/cr9904009.



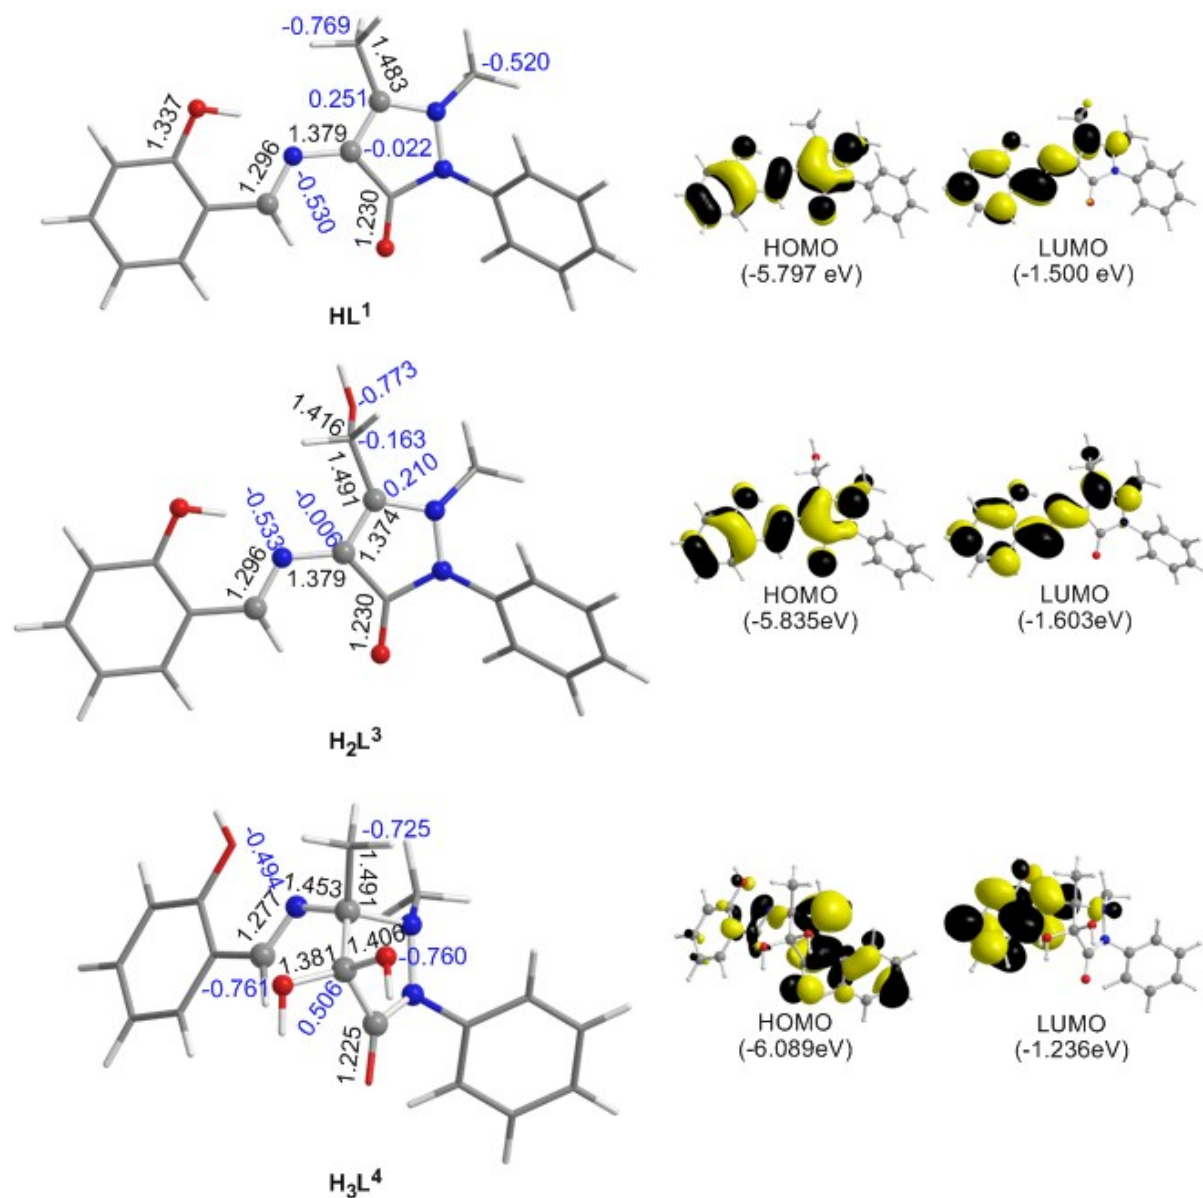

**Figure S15.** Ground state geometries of the  $[HL^1]$ ,  $[H_2L^3]$  and  $[H_3L^4]$  species, the natural atomic charges on selected atoms and the frontier molecular orbitals (FMOs) relevant to coordination of the ligands in MeCN solutions calculated by the PBE0/6-31G(d,p)/PCM computational protocol

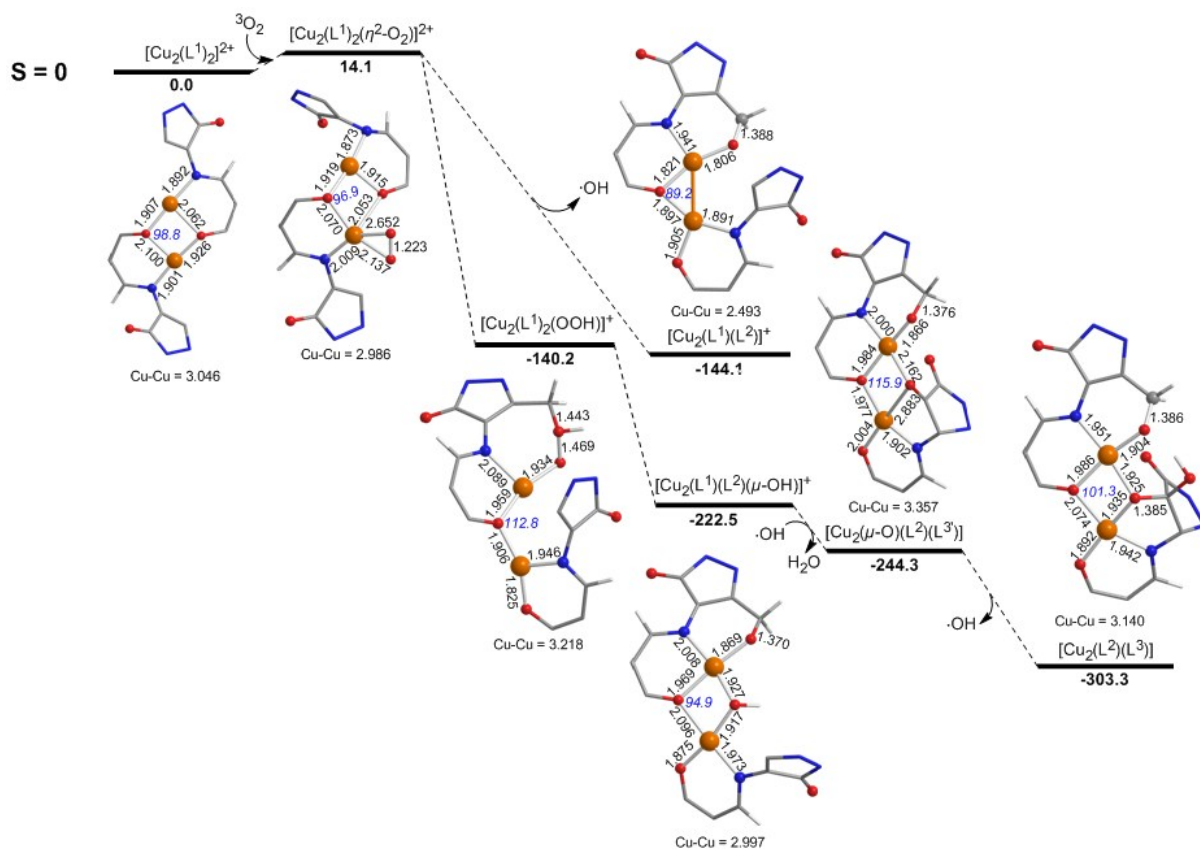

**Figure S16.** Geometric and energy profile of the reaction trajectory for the  $L^1 \rightarrow L^2$  and  $L^1 \rightarrow L^3$  ligand transformations in the dinuclear  $[Cu_2(L^1)_2]$  complex along the singlet PES calculated by the PBE0/Def2-TZVP(Co)  $\cup$  6-31G(d,p)(E)/PCM (E = main group element) computational protocol.

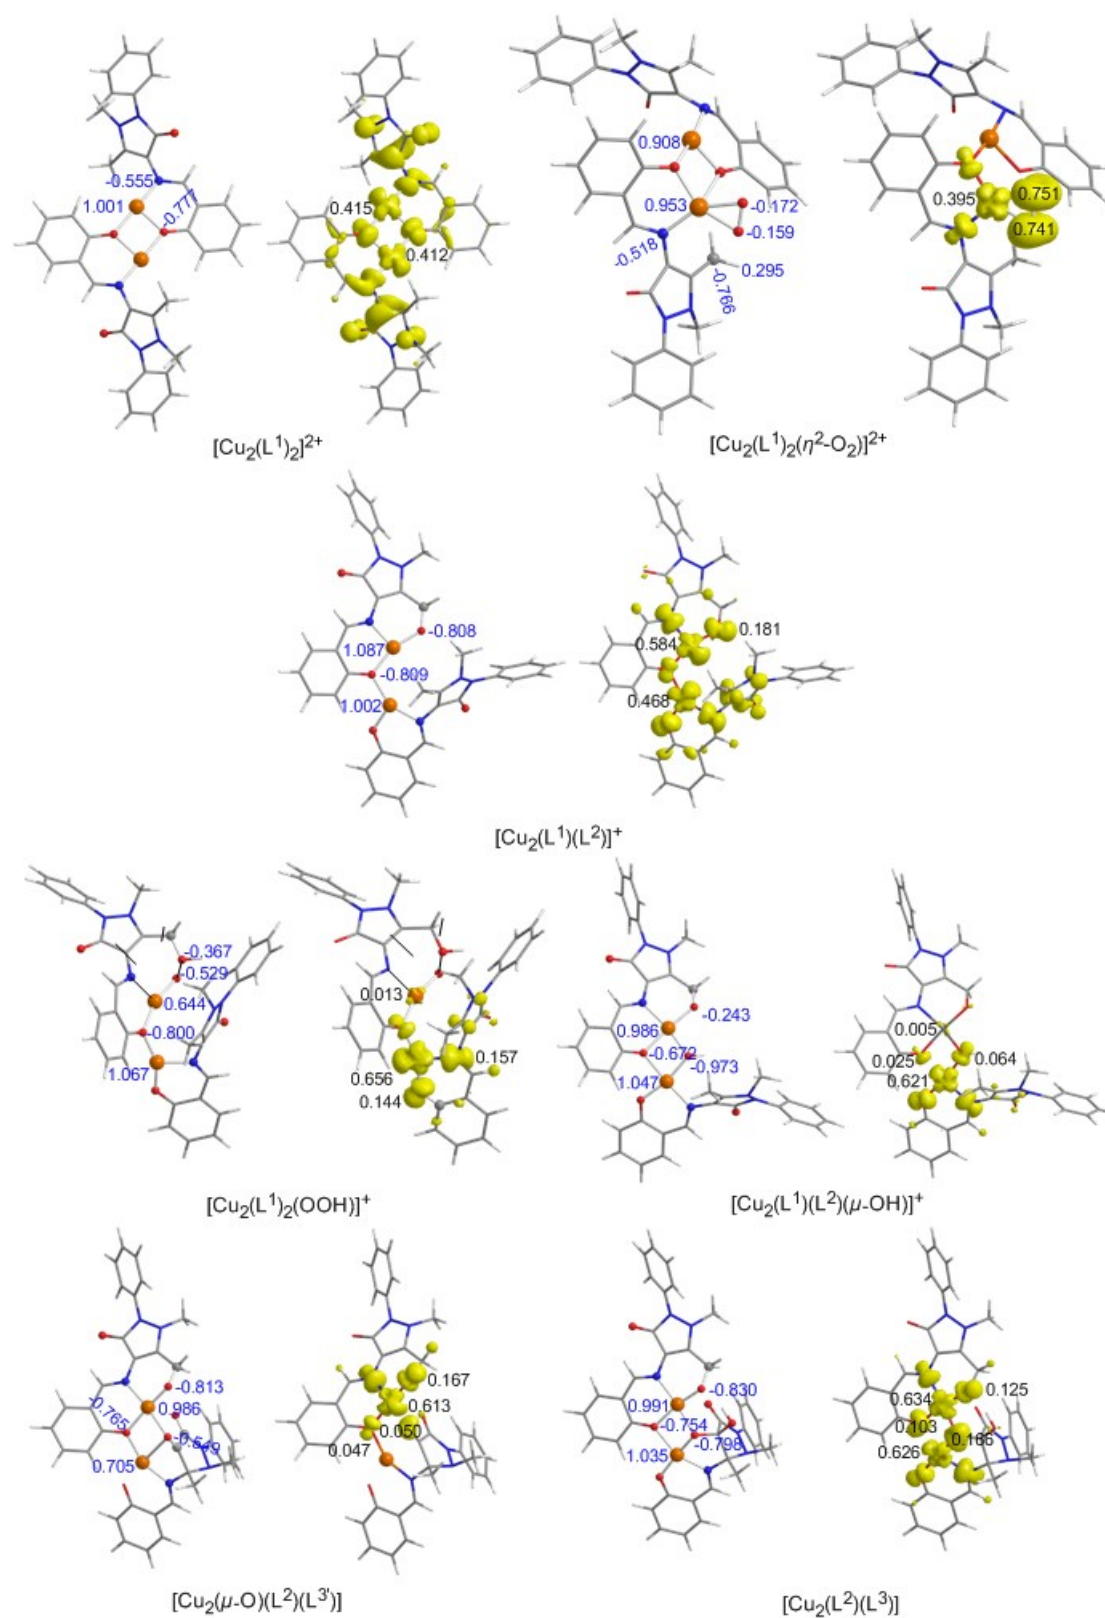

**Figure S17.** The natural atomic charges along with the 3D plots of the spin density distribution (isosurface = 0.002) of all stationary point located on the triplet PES calculated at the PBE0/Def2-TZVP(Cu) ∪ 6-31G(d,p)(E) level.

**Table S1.** Cartesian Coordinates and energies of molecules under study calculated at the PBE0/Def2-TZVP(Cu)∪6-31G(d,p)(E) level in solution.

[L]<sup>1-</sup>

|                                               |              |
|-----------------------------------------------|--------------|
| C,0,-6.2941982769,-1.1472107307,0.1472635974  |              |
| C,0,-5.8813555819,0.1478288925,0.3591998498   |              |
| C,0,-4.4947733265,0.5623826033,0.315092887    |              |
| C,0,-3.5492895172,-0.5138841237,0.0193143273  |              |
| C,0,-4.0262705422,-1.8278727807,-0.189620828  |              |
| C,0,-5.3635304781,-2.168462781,-0.132893821   |              |
| O,0,-4.1759633765,1.7633717034,0.5212647395   |              |
| C,0,-2.1204053589,-0.3532841671,-0.0876094881 |              |
| N,0,-1.4543771919,0.752182719,0.0550831611    |              |
| C,0,-0.0808044475,0.7512229839,-0.0802156953  |              |
| C,0,0.8557511068,-0.3587820301,-0.2455742292  |              |
| N,0,2.1215958697,0.2420314709,-0.3219109437   |              |
| N,0,2.0211300626,1.6169501446,-0.0961453742   |              |
| C,0,0.6691214231,1.8989740154,-0.032678257    |              |
| O,0,0.6757468378,-1.5768995221,-0.2771608838  |              |
| C,0,3.3297387043,-0.4150885853,-0.0093117671  |              |
| C,0,3.6226331097,-1.6327881339,-0.6307772005  |              |
| C,0,4.8069522063,-2.2930872125,-0.3213638657  |              |
| C,0,5.7133567923,-1.7420548281,0.582450759    |              |
| C,0,5.4196712544,-0.5238546634,1.1905161404   |              |
| C,0,4.2286847144,0.1377396912,0.9080868518    |              |
| C,0,0.1733143457,3.2938175943,0.0596157875    |              |
| C,0,2.8681182952,2.4332823885,-0.9620817212   |              |
| H,0,-7.3558504461,-1.3867220801,0.1969689915  |              |
| H,0,-6.6054200764,0.931485157,0.5753461922    |              |
| H,0,-3.2892156431,-2.6021444901,-0.4065855734 |              |
| H,0,-5.6888162788,-3.1909797182,-0.2995929325 |              |
| H,0,-1.5822215514,-1.2827427849,-0.3138854887 |              |
| H,0,2.9188332491,-2.0515984292,-1.3392247505  |              |
| H,0,5.0272309033,-3.2411812532,-0.8033470968  |              |
| H,0,6.6413982134,-2.2575470016,0.8099795931   |              |
| H,0,6.1151858823,-0.0863135034,1.9007631847   |              |
| H,0,3.9828557463,1.0729594475,1.4005506488    |              |
| H,0,0.688391381,3.8529186284,0.8471621865     |              |
| H,0,-0.8949167771,3.2580318695,0.2803342053   |              |
| H,0,0.3108010066,3.8394861044,-0.8812465655   |              |
| H,0,2.767227045,3.4743903935,-0.6544300851    |              |
| H,0,2.5872348076,2.3303071264,-2.0172281756   |              |
| H,0,3.9095359136,2.1370358856,-0.8315083599   |              |
| Sum of electronic and zero-point Energies=    | -1008.913518 |
| Sum of electronic and thermal Energies=       | -1008.893730 |
| Sum of electronic and thermal Enthalpies=     | -1008.892786 |
| Sum of electronic and thermal Free Energies=  | -1008.962922 |

HL<sup>1</sup>

|                                              |  |
|----------------------------------------------|--|
| C,0,-5.7478990575,-2.0832135137,0.6487254585 |  |
| C,0,-5.3666200417,-0.7519363826,0.5558068143 |  |
| C,0,-4.0185695482,-0.4163766566,0.3898979709 |  |
| C,0,-3.0448655313,-1.4458542905,0.3174056313 |  |
| C,0,-3.4633697198,-2.7831865516,0.4144085094 |  |
| C,0,-4.7994752332,-3.1094690354,0.5786695866 |  |
| O,0,-3.6732346919,0.8727767009,0.3020580177  |  |
| C,0,-1.6391164206,-1.1434475385,0.1475519599 |  |
| N,0,-1.2276906693,0.0823491874,0.055300227   |  |
| C,0,0.1074230124,0.3895129248,-0.1053892116  |  |
| C,0,1.2408159765,-0.5206629682,-0.1161206093 |  |
| N,0,2.3557255012,0.3064238892,-0.3011951189  |  |
| N,0,1.9637194782,1.6429318254,-0.2902940504  |  |
| C,0,0.5964460126,1.667149977,-0.248455088    |  |
| O,0,1.2993609472,-1.7402452273,0.0365556288  |  |
| C,0,3.6664754718,-0.0398212155,0.100902166   |  |
| C,0,4.2358743894,-1.2101293373,-0.4043939923 |  |
| C,0,5.5158118123,-1.5761139249,-0.0011248618 |  |
| C,0,6.2375289025,-0.77344546,0.8800132173    |  |
| C,0,5.664972703,0.3970908287,1.3723976695    |  |

C,0,4.3761544405,0.7631738907,0.9971897144  
C,0,-0.1555688204,2.938599334,-0.3843068381  
C,0,2.7078621005,2.5370282446,-1.1695003665  
H,0,-6.7989004289,-2.326405521,0.7774134432  
H,0,-6.0969427095,0.0494866354,0.6091553085  
H,0,-2.7110052432,-3.5664090346,0.3577232851  
H,0,-5.1068238038,-4.1474871662,0.6521426695  
H,0,-2.6775478321,0.8842598993,0.1888813187  
H,0,-0.9367134393,-1.9785036812,0.1022834561  
H,0,3.6723020243,-1.8216309421,-1.0986980984  
H,0,5.9555580715,-2.4892347829,-0.3909919535  
H,0,7.2409464958,-1.0583995612,1.1809242285  
H,0,6.2169404891,1.0261262386,2.0643170985  
H,0,3.9135496952,1.6581114202,1.4013455729  
H,0,0.2588111534,3.7157081248,0.2639219699  
H,0,-1.1985584883,2.7762414815,-0.111714145  
H,0,-0.1288232146,3.3086175743,-1.4152204246  
H,0,2.3739209767,3.557013121,-0.9814001699  
H,0,2.550453381,2.2823200135,-2.2233537561  
H,0,3.7698408584,2.4743094799,-0.9326812382

|                                              |              |
|----------------------------------------------|--------------|
| Sum of electronic and zero-point Energies=   | -1009.409284 |
| Sum of electronic and thermal Energies=      | -1009.389481 |
| Sum of electronic and thermal Enthalpies=    | -1009.388536 |
| Sum of electronic and thermal Free Energies= | -1009.459279 |

[L<sup>2</sup>]<sup>2</sup>-

C,0,-6.2908574972,-1.363119102,0.23236714  
C,0,-5.8486124874,-0.1218300245,0.6356347893  
C,0,-4.4654197285,0.2966107822,0.5695297861  
C,0,-3.5522839319,-0.7139020743,0.0371400874  
C,0,-4.0553489598,-1.9698339023,-0.3608797888  
C,0,-5.392645625,-2.3180641259,-0.2792149267  
O,0,-4.1206525328,1.4489015621,0.9505220506  
C,0,-2.1227198318,-0.5394539483,-0.1184687813  
N,0,-1.4434862843,0.5255021328,0.165513236  
C,0,-0.070492383,0.5480271908,-0.0122657845  
C,0,0.8502898167,-0.543914865,-0.2583453302  
N,0,2.1243211784,0.0625308686,-0.3247229969  
N,0,2.0107147242,1.4192316161,-0.0174192187  
C,0,0.6776454397,1.7082006446,0.0877892949  
O,0,0.6787403217,-1.7650323598,-0.3541114571  
C,0,3.3244714337,-0.6086449864,-0.0270996704  
C,0,4.2157509816,-0.1049855628,0.9268282149  
C,0,5.4039730299,-0.7800511477,1.1889834058  
C,0,5.7059384534,-1.9665688402,0.5246874696  
C,0,4.8077514217,-2.4719115945,-0.4139093861  
C,0,3.6267954106,-1.796519133,-0.7022437355  
C,0,0.2027976405,3.1533766975,0.2223923112  
O,0,1.0682841581,4.0371610086,0.7234783031  
C,0,2.8823310671,2.3393343936,-0.7377850277  
H,0,-7.3500105225,-1.6071246896,0.3104926047  
H,0,-6.5488226099,0.6128909268,1.0303199045  
H,0,-3.341063561,-2.6958790452,-0.7524535993  
H,0,-5.7369441155,-3.2975320557,-0.5982032244  
H,0,-1.6068446175,-1.4246919306,-0.5149223707  
H,0,3.9635304245,0.8027317579,1.4653017771  
H,0,6.0913211126,-0.3784405096,1.9281765822  
H,0,6.6322972893,-2.4923277664,0.7354788244  
H,0,5.0327856528,-3.3956235005,-0.9395977605  
H,0,2.929023047,-2.1800089006,-1.4363512134  
H,0,-0.7673043254,3.0345960131,0.7780087283  
H,0,-0.1747538289,3.3671509959,-0.8288231428  
H,0,2.5626732003,3.3280242949,-0.372453898  
H,0,2.7417712224,2.2464882231,-1.8224502228  
H,0,3.9271558159,2.1395009562,-0.4909229743

|                                              |              |
|----------------------------------------------|--------------|
| Sum of electronic and zero-point Energies=   | -1083.530237 |
| Sum of electronic and thermal Energies=      | -1083.510042 |
| Sum of electronic and thermal Enthalpies=    | -1083.509098 |
| Sum of electronic and thermal Free Energies= | -1083.580166 |

## H<sub>2</sub>L<sup>2</sup>

C,0,-5.653725585,-2.4921631439,-0.4520038793  
C,0,-5.311437114,-1.2418340858,0.0431978236  
C,0,-3.9740841271,-0.8306675964,0.0512414339  
C,0,-2.9717162798,-1.7009953063,-0.4502931234  
C,0,-3.3514326022,-2.9596949817,-0.9457947616  
C,0,-4.6767190754,-3.3611189411,-0.9507463055  
O,0,-3.6674067691,0.3790850259,0.5310867653  
C,0,-1.5765886992,-1.3175614096,-0.4607331641  
N,0,-1.1989516438,-0.1645009789,-0.0031159441  
C,0,0.1260135946,0.216709035,-0.0111459057  
C,0,1.2817515355,-0.5616720606,-0.4349269242  
N,0,2.3709800301,0.2884314924,-0.2217801868  
N,0,1.9537207215,1.4649312975,0.3895606052  
C,0,0.5887268912,1.4270883222,0.4449193687  
O,0,1.3699708435,-1.7150625725,-0.8541854962  
C,0,3.7055742277,-0.1531365074,-0.0672336582  
C,0,4.4244382672,0.1444952342,1.0928179217  
C,0,5.7356558924,-0.3029217542,1.2186912891  
C,0,6.3205404681,-1.0640395446,0.2090463314  
C,0,5.5892561942,-1.3703368195,-0.9367410518  
C,0,4.2856776956,-0.9086868058,-1.0871971576  
C,0,-0.1999671397,2.599223192,0.9217052522  
O,0,-0.2755743007,3.5508304978,-0.1239386369  
C,0,2.6772671002,2.6784691392,0.0248077918  
H,0,-6.6968380559,-2.7957829784,-0.450704843  
H,0,-6.06432588,-0.56254402,0.4306525122  
H,0,-2.5771188344,-3.6200242269,-1.3291988254  
H,0,-4.9543811229,-4.3365662678,-1.3362976538  
H,0,-2.6739480785,0.4687941637,0.4418810197  
H,0,-0.8518488646,-2.0281203733,-0.8639510349  
H,0,3.9518301737,0.7110023764,1.8891587119  
H,0,6.2957625883,-0.0653518532,2.118029318  
H,0,7.3416520852,-1.4171689994,0.31490078  
H,0,6.039105691,-1.9621362146,-1.7282147757  
H,0,3.7135905676,-1.1303058408,-1.9802091055  
H,0,0.2823574845,3.0155998256,1.8170311186  
H,0,-1.19132717,2.2366232392,1.218873237  
H,0,-0.722711682,4.3287047056,0.2282097163  
H,0,2.2556622362,3.5079301203,0.5897276279  
H,0,2.5820157142,2.8850220679,-1.0457637937  
H,0,3.7285420221,2.5660315477,0.2892666027

|                                              |              |
|----------------------------------------------|--------------|
| Sum of electronic and zero-point Energies=   | -1084.535934 |
| Sum of electronic and thermal Energies=      | -1084.514916 |
| Sum of electronic and thermal Enthalpies=    | -1084.513972 |
| Sum of electronic and thermal Free Energies= | -1084.587788 |

## [HL]<sup>3</sup>-

C,0,5.5284236907,-1.7471016463,-0.4386716211  
C,0,4.9807082964,-1.5111237587,0.8032710818  
C,0,3.744074759,-0.7883134296,1.0105971033  
C,0,3.1052383392,-0.3177431897,-0.2151730967  
C,0,3.7064281456,-0.586990845,-1.4610390416  
C,0,4.8939842029,-1.2846692123,-1.6059850668  
O,0,3.2964806884,-0.604480126,2.1764036571  
C,0,1.8605731518,0.4374263429,-0.2908703088  
N,0,1.1344444213,0.8276717281,0.6973023852  
C,0,-0.5709659089,1.7338876456,-1.0054971618  
C,0,-1.2354449027,0.352106851,-1.2521244659  
N,0,-1.6078110939,-0.1423708836,-0.0145375524  
N,0,-1.2426024153,0.76323645,1.0495385526  
C,0,-0.1123404823,1.5583794346,0.4797607  
O,0,-1.4939170271,-0.1857718836,-2.3202218391  
C,0,-2.7714159929,-0.9158861875,0.149214481  
C,0,-3.7855494616,-0.5152041796,1.0282228372  
C,0,-4.9387789524,-1.2823041539,1.1563220054  
C,0,-5.1039343034,-2.4460605916,0.4074142737  
C,0,-4.0964922731,-2.8384847306,-0.4720601631  
C,0,-2.9311567807,-2.0891906627,-0.5985041016  
C,0,-0.0012600115,2.8906398635,1.1961718821  
O,0,-1.8187848692,2.5619038288,-0.9376289487

O,0,0.2551371614,2.2030649786,-1.8862914907  
C,0,-0.8957966405,-0.0011727744,2.2422702511  
H,0,6.4648959615,-2.2991899267,-0.5159483549  
H,0,5.4778526814,-1.8716542497,1.7025899012  
H,0,3.1968343914,-0.2181573168,-2.3524211581  
H,0,5.3209799212,-1.4682154687,-2.5876125821  
H,0,1.5681326337,0.7105226172,-1.3149512746  
H,0,-3.6602653315,0.4062644769,1.586831076  
H,0,-5.7180749859,-0.9608425972,1.8420617951  
H,0,-6.0057191534,-3.0422554356,0.5105799084  
H,0,-4.2101782095,-3.74572055,-1.0592421771  
H,0,-2.1436072761,-2.3964980732,-1.2752485859  
H,0,-0.9709862123,3.3881269739,1.229539383  
H,0,0.6974981628,3.5184394251,0.6332028219  
H,0,0.3923591671,2.7630093116,2.2093587518  
H,0,-1.7100825553,3.0165482284,-1.783583871  
H,0,-0.4792102312,0.6947143637,2.9733251135  
H,0,-0.158704766,-0.7897919563,2.0566453525  
H,0,-1.8011659391,-0.4409486909,2.6702895481

Sum of electronic and zero-point Energies= -1159.865763  
Sum of electronic and thermal Energies= -1159.844017  
Sum of electronic and thermal Enthalpies= -1159.843073  
Sum of electronic and thermal Free Energies= -1159.916243

### H<sub>3</sub>L<sup>3</sup>

C,0,2.7619668525,-0.8207566117,-4.9833415164  
C,0,2.1403530625,-2.03434518,-4.7211678002  
C,0,1.3195098307,-2.1943409702,-3.6003480172  
C,0,1.1207987932,-1.107736494,-2.7179480645  
C,0,1.7628763922,0.1054655466,-3.0160026134  
C,0,2.5753279425,0.2639678431,-4.1280289456  
O,0,0.7115283617,-3.3705613526,-3.3515830247  
C,0,0.2934729269,-1.124248154,-1.5077110526  
N,0,-0.3196642219,-2.1496403667,-1.0579342686  
C,0,-1.0321113801,-0.9042318531,1.0504638671  
C,0,-1.8242044935,0.1945143901,0.3549708707  
N,0,-2.7159936964,-0.4229007072,-0.4565092558  
N,0,-2.614819578,-1.8582276153,-0.3692482505  
C,0,-1.2080353206,-2.100547741,0.0913299451  
O,0,-1.6888999983,1.3903899235,0.5819709286  
C,0,-3.9343114472,0.1705678754,-0.8676038532  
C,0,-5.1525097811,-0.4382969607,-0.5575746188  
C,0,-6.3396625245,0.1719319573,-0.9478727635  
C,0,-6.3173603109,1.3890857806,-1.626448926  
C,0,-5.0974931545,1.994079854,-1.9203936162  
C,0,-3.9012795565,1.3853564769,-1.5527920474  
C,0,-1.1217073131,-3.443141214,0.795391028  
O,0,-1.7207663725,-1.2039524702,2.2395958803  
O,0,0.2802147892,-0.5444418005,1.2864322193  
C,0,-2.9312006116,-2.4688405081,-1.6595661609  
H,0,3.3935281861,-0.7255405007,-5.8616946107  
H,0,2.2869640665,-2.8782465876,-5.3914660357  
H,0,1.6082786902,0.9430730094,-2.3398860412  
H,0,3.0563070766,1.2157431546,-4.32718333  
H,0,0.9429327346,-3.9927748815,-4.0525499447  
H,0,0.2767619651,-0.1486658107,-1.0086556911  
H,0,-5.1573924207,-1.3738206973,-0.0077145589  
H,0,-7.2867151179,-0.3032746957,-0.7103872451  
H,0,-7.24708282,1.8628765876,-1.9261564908  
H,0,-5.0723776366,2.9409822758,-2.4512354611  
H,0,-2.9474246585,1.8423381049,-1.7899030036  
H,0,-1.8368211618,-3.5004930239,1.6150775922  
H,0,-0.10983309,-3.5758428056,1.1885624878  
H,0,-1.310237439,-4.2471185675,0.0806352681  
H,0,-1.7418743559,-0.3969179235,2.7715212654  
H,0,0.2824540442,0.419740924,1.398674128  
H,0,-2.6679533826,-3.5254558543,-1.5977386166  
H,0,-2.3922646974,-2.0177874142,-2.5000546797  
H,0,-4.0058631738,-2.3965969417,-1.8367939759

Sum of electronic and zero-point Energies= -1160.836957  
Sum of electronic and thermal Energies= -1160.814534  
Sum of electronic and thermal Enthalpies= -1160.813590

Sum of electronic and thermal Free Energies= -1160.888748

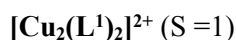

Cu, 0, -1.3906484923, 0.0209433661, 0.452909477  
O, 0, -0.0071296056, 1.3207121222, -0.1443463973  
O, 0, -5.1659620604, 1.9689872864, -0.779832474  
N, 0, -2.7067017461, 1.2934872639, 0.8482393071  
N, 0, -6.1189399376, 0.2753130921, 0.5099912825  
N, 0, -5.6385157547, -0.6048758597, 1.4651841763  
C, 0, -0.0875822589, 2.6306640267, 0.0033545666  
C, 0, 1.0482437088, 3.4363376135, -0.1730210721  
C, 0, 0.9547087095, 4.8146140014, -0.1075904223  
C, 0, -0.270826132, 5.4469829996, 0.1532933668  
C, 0, -1.3907751929, 4.6734967374, 0.3580899032  
C, 0, -1.3345027071, 3.2584761066, 0.3121422773  
C, 0, -2.5477223636, 2.5759310521, 0.6266408362  
C, 0, -3.9639088236, 0.7438136059, 0.9412382563  
C, 0, -5.092154119, 1.1252136789, 0.1044127669  
C, 0, -4.3691672069, -0.3017531942, 1.7715271488  
C, 0, -7.258843699, -0.0378036502, -0.2813409865  
C, 0, -7.3603212512, -1.2761464602, -0.9170266247  
C, 0, -8.4785480663, -1.5460323115, -1.6991639774  
C, 0, -9.4668674004, -0.5772615894, -1.8673759555  
C, 0, -9.3439383792, 0.6626262798, -1.2439719588  
C, 0, -8.2429280858, 0.9351453605, -0.4371783665  
C, 0, -6.5732573675, -1.3369552065, 2.2989375127  
C, 0, -3.6317404614, -0.9568156083, 2.8801663194  
Cu, 0, 1.3843463121, 0.0129812877, -0.4457144425  
O, 0, -0.0042344828, -1.2863249175, 0.1439298248  
O, 0, 5.1437983811, -1.9805322961, 0.7974430894  
N, 0, 2.695159841, -1.2708041397, -0.8359359799  
N, 0, 6.1175474251, -0.2913398117, -0.4829701981  
N, 0, 5.6488407321, 0.5978695416, -1.4356755608  
C, 0, 0.0568341525, -2.5918509053, -0.0438930505  
C, 0, -1.0964465888, -3.3821209342, 0.079523727  
C, 0, -1.0220441067, -4.7595957896, -0.0177203559  
C, 0, 0.2011159958, -5.40422744, -0.2605605794  
C, 0, 1.3375388366, -4.6439342891, -0.4203582217  
C, 0, 1.3002487303, -3.2299086639, -0.3430981022  
C, 0, 2.523999287, -2.5543189967, -0.6293775484  
C, 0, 3.9582397292, -0.7338215524, -0.9196003571  
C, 0, 5.0806512878, -1.1319658957, -0.0829623423  
C, 0, 4.3765541548, 0.309933783, -1.7450161587  
C, 0, 7.2581183601, 0.0071567127, 0.3128552804  
C, 0, 8.2273977732, -0.9795297666, 0.4753187573  
C, 0, 9.3284578975, -0.7210839299, 1.2866383199  
C, 0, 9.4665211554, 0.5182770243, 1.9079280149  
C, 0, 8.4930399724, 1.5007740542, 1.7330441639  
C, 0, 7.3745850068, 1.2452784261, 0.9464180567  
C, 0, 6.5937569585, 1.3186138856, -2.2680465213  
C, 0, 3.6474073757, 0.975517405, -2.8528300712  
H, 0, 1.9998998355, 2.9583344512, -0.3862569563  
H, 0, 1.8469193761, 5.4128026247, -0.267335806  
H, 0, -0.33203437, 6.5284727829, 0.1998327774  
H, 0, -2.3456200256, 5.1437916099, 0.5756569406  
H, 0, -3.4327033729, 3.2027004948, 0.7374135994  
H, 0, -6.5703901058, -2.0127600958, -0.8024727989  
H, 0, -8.5692483704, -2.510215144, -2.1894971984  
H, 0, -10.3331899468, -0.7896421367, -2.4862584306  
H, 0, -10.1125498929, 1.41792002, -1.3744542543  
H, 0, -8.1402173669, 1.8885722437, 0.0697615133  
H, 0, -7.0909821949, -0.6530786037, 2.9778780057  
H, 0, -6.0136413891, -2.0757674584, 2.869448644  
H, 0, -7.2993228445, -1.8527418278, 1.6717125376  
H, 0, -4.1299642295, -0.777800752, 3.8380295397  
H, 0, -3.5580212886, -2.037314393, 2.7282337797  
H, 0, -2.6231394252, -0.5449223749, 2.9497220396  
H, 0, -2.0452075944, -2.8906986171, 0.2756244738  
H, 0, -1.9270357754, -5.3478291994, 0.1019211009  
H, 0, 0.2473244921, -6.4851687746, -0.3311501009  
H, 0, 2.290059436, -5.1234524053, -0.6277965432  
H, 0, 3.4049333197, -3.1872734299, -0.7372393897  
H, 0, 8.1133349662, -1.9325242713, -0.0299660407  
H, 0, 10.0854691438, -1.4871124068, 1.4222723543  
H, 0, 10.3330100019, 0.7195099288, 2.5302914248



H,0,8.5953256961,2.4646747587,2.2216550641  
H,0,6.5959057846,1.9929810701,0.8268375116  
H,0,7.3257357306,1.8247847731,-1.6398770617  
H,0,6.044102369,2.0646882733,-2.8388002456  
H,0,7.1033255184,0.6284837417,-2.9468399147  
H,0,3.5888123776,2.0570382456,-2.701217965  
H,0,4.1419576089,0.7894288345,-3.8112796566  
H,0,2.6329030529,0.5781119561,-2.9214657103

Sum of electronic and zero-point Energies= -5297.921921  
Sum of electronic and thermal Energies= -5297.877235  
Sum of electronic and thermal Enthalpies= -5297.876291  
Sum of electronic and thermal Free Energies= -5298.008693

### [Cu<sub>2</sub>(L<sup>1</sup>)<sub>2</sub>]<sup>2+</sup> (S =0)

Cu,0,1.4195199533,0.2074005371,0.4676004528  
O,0,-0.0453249422,-1.2500936133,0.09419324  
O,0,5.3933630987,-2.0168236891,-0.5601063591  
N,0,2.8119486655,-1.0498934954,0.7767979851  
N,0,6.2855995523,-0.1740961204,0.5460055426  
N,0,5.7618032971,0.8547103563,1.308240526  
C,0,0.14496599,-2.5382084924,0.1796140967  
C,0,-0.9510446999,-3.4257776468,0.1089346092  
C,0,-0.7608906506,-4.7903696515,0.1155820694  
C,0,0.5319851594,-5.3349533686,0.2315206892  
C,0,1.6127223782,-4.4903923714,0.3497913423  
C,0,1.4666729245,-3.0813334601,0.3467996776  
C,0,2.6690095987,-2.3406704043,0.5649334137  
C,0,4.0828591812,-0.5304584755,0.8618097837  
C,0,5.265097002,-1.0560228785,0.1906563856  
C,0,4.4599225233,0.6222990003,1.5491047497  
C,0,7.4807952504,-0.0010618882,-0.2031390724  
C,0,7.6987006693,1.1681381762,-0.9337151857  
C,0,8.873109358,1.2996753026,-1.6678602741  
C,0,9.8032008377,0.2618647718,-1.696435502  
C,0,9.5641955005,-0.9089001633,-0.9798152511  
C,0,8.406382172,-1.0421076308,-0.2192543807  
C,0,6.6481491834,1.6389353305,2.1491496809  
C,0,3.6731359559,1.4553042408,2.4916564028  
Cu,0,-1.4442334887,-0.1092010813,-0.5194139331  
O,0,-0.0336368778,1.3363265995,-0.1026034254  
O,0,-5.2752754069,1.8899953032,0.7912462636  
N,0,-2.8236351685,1.1405293429,-0.8565696301  
N,0,-6.1739798903,0.0494342836,-0.3083982389  
N,0,-5.7004905125,-0.8591775563,-1.2338070029  
C,0,-0.1968958188,2.6130989375,-0.2799369576  
C,0,0.9203020214,3.478211522,-0.3115952296  
C,0,0.7480864712,4.8420779046,-0.3573664156  
C,0,-0.5433753563,5.410266431,-0.4226694271  
C,0,-1.6447460383,4.590515764,-0.4601339696  
C,0,-1.5172684131,3.1774603602,-0.4245578537  
C,0,-2.7103833857,2.4356153664,-0.6083359151  
C,0,-4.0486253998,0.5524000258,-0.8370295918  
C,0,-5.183873775,0.9682565729,-0.0084327578  
C,0,-4.4475596859,-0.5759510199,-1.5796816405  
C,0,-7.4319315559,-0.0955505252,0.3438886634  
C,0,-8.5051125678,0.6859687435,-0.0786922996  
C,0,-9.7280806725,0.5648513274,0.5743808492  
C,0,-9.8692672282,-0.3335269713,1.6302670577  
C,0,-8.7883360216,-1.1103749302,2.04498469  
C,0,-7.5583786743,-0.9901822237,1.4064631948  
C,0,-6.5863755143,-1.8610951002,-1.7850940011  
C,0,-3.7002529907,-1.3107391144,-2.6298240431  
H,0,-1.9455785688,-2.9979354764,0.0230390832  
H,0,-1.6193939926,-5.4503860863,0.035057534  
H,0,0.673013347,-6.4101325244,0.2432360784  
H,0,2.6111113328,-4.9036229803,0.4618276221  
H,0,3.5776993067,-2.9417179277,0.587133871  
H,0,6.954329603,1.9590915234,-0.9295991675  
H,0,9.0530118389,2.2104570568,-2.2304967929  
H,0,10.7139580424,0.3660457688,-2.2780677471  
H,0,10.2869564598,-1.7185990893,-1.0003175628

H,0,8.2145319231,-1.9396083387,0.3584848666  
H,0,6.9908685267,1.0449575749,3.0020857807  
H,0,6.1015551649,2.5132241515,2.4986131416  
H,0,7.5047808781,1.9719772241,1.5648660697  
H,0,4.0875115021,1.3955632987,3.5031831368  
H,0,3.6620201183,2.5058302945,2.1871831324  
H,0,2.6415469349,1.0975084132,2.5377053051  
H,0,1.9095205651,3.0338849838,-0.2540044741  
H,0,1.6186389648,5.4907811854,-0.3440193538  
H,0,-0.6605077752,6.4874027873,-0.465163666  
H,0,-2.6398350298,5.0173867065,-0.5428410702  
H,0,-3.6341620957,3.0132494181,-0.6029949511  
H,0,-8.3748073199,1.376495644,-0.9057604645  
H,0,-10.5704691467,1.1703804525,0.2557623316  
H,0,-10.8260410264,-0.4275240554,2.1347677133  
H,0,-8.8999341527,-1.8055375955,2.8709079233  
H,0,-6.7020475484,-1.5767556807,1.7251216464  
H,0,-6.9687405828,-2.4986636663,-0.9860493884  
H,0,-6.0192651579,-2.4648433956,-2.4896129224  
H,0,-7.4193410585,-1.3754556945,-2.2993443882  
H,0,-3.4881552838,-2.3405404042,-2.3279827071  
H,0,-4.263087802,-1.3340344976,-3.5671329483  
H,0,-2.753229976,-0.8032763984,-2.8261056405

Sum of electronic and zero-point Energies= -5297.899853  
Sum of electronic and thermal Energies= -5297.856056  
Sum of electronic and thermal Enthalpies= -5297.855112  
Sum of electronic and thermal Free Energies= -5297.982221

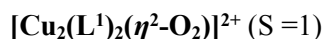

Cu,0,-1.6234046948,-0.622344217,-1.5084273499  
O,0,-0.2755744125,-1.9864681926,-1.4310581709  
O,0,-4.0173778846,-1.2360847786,1.3569197552  
N,0,-3.0601902759,-1.7806157925,-1.4546901571  
N,0,-5.0848979174,0.5428938488,0.2999139572  
N,0,-5.2087095156,0.9407087135,-1.0257246238  
C,0,-0.5222217482,-3.2504930205,-1.4428898693  
C,0,0.4984664778,-4.1654224528,-1.8060347878  
C,0,0.3244897188,-5.5101805283,-1.5886658605  
C,0,-0.8832497617,-6.0372816362,-1.0602861461  
C,0,-1.9246198157,-5.1966724632,-0.7835961515  
C,0,-1.8015387758,-3.796101721,-1.0213554421  
C,0,-2.9467421813,-3.008296528,-0.9390821538  
C,0,-3.8512217854,-0.7966189044,-1.0313791522  
C,0,-4.294829193,-0.5833186086,0.3737016016  
C,0,-4.517264608,0.1850983913,-1.8471293006  
C,0,-5.7319822576,1.2193593056,1.3763849915  
C,0,-5.1035921009,2.3174027118,1.9620947282  
C,0,-5.7296162046,2.9587786234,3.0256337285  
C,0,-6.9583971724,2.495954392,3.4940354821  
C,0,-7.5708873089,1.3916912699,2.9038212004  
C,0,-6.9593500822,0.7443782516,1.8350569913  
C,0,-6.0612460504,2.0680460791,-1.3505428065  
C,0,-4.5146210327,0.3051366678,-3.3223967061  
Cu,0,1.4030726941,-0.1156134078,-1.7149698958  
O,0,-0.3530326974,0.7891976006,-1.6532650126  
O,0,4.3966002389,2.2657723562,1.0127056138  
N,0,2.0538110563,0.6065496771,-0.0101744704  
N,0,5.371277458,0.1694483078,1.3115737648  
N,0,5.0111223212,-1.1405885863,1.015534068  
C,0,-0.5083396003,1.9728067688,-1.0329383761  
C,0,-1.5641219742,2.8067080797,-1.4200716619  
C,0,-1.7844467658,4.0242894153,-0.7924243493  
C,0,-0.9431834476,4.4507393006,0.2385089191  
C,0,0.1219228629,3.6500299558,0.6093153167  
C,0,0.3756640904,2.4095432355,-0.0114148246  
C,0,1.5453084737,1.7066486083,0.4616166142  
C,0,3.2650107021,0.1639229949,0.5231540576  
C,0,4.3337242239,1.0394640089,0.9710121231  
C,0,3.708660322,-1.1335701333,0.6075195603  
C,0,6.7378634374,0.5412994615,1.3172879921  
C,0,7.1419196233,1.5934967263,2.1400810838  
C,0,8.4762092704,1.9877204471,2.1354513483  
C,0,9.4069225544,1.325367673,1.337214611  
C,0,8.9949740875,0.2702829368,0.5258086073

C,0,7.6591868133,-0.1187429591,0.5010831224  
 C,0,5.5387424672,-2.1772485411,1.8940340136  
 C,0,2.9596739036,-2.3973601585,0.4002919415  
 O,0,2.779253204,-1.0966234217,-2.7506450774  
 O,0,1.7617811809,-0.9223646161,-3.5151967537  
 H,0,1.4325288266,-3.767841881,-2.1862281786  
 H,0,1.1389048219,-6.1905049082,-1.8197243596  
 H,0,-0.98262812,-7.105917132,-0.9077001661  
 H,0,-2.8735194878,-5.5829711213,-0.4246146291  
 H,0,-3.8604640479,-3.4459918008,-0.5379465959  
 H,0,-4.1421880645,2.6558292836,1.5877934482  
 H,0,-5.254820064,3.8161779924,3.4912352794  
 H,0,-7.4408451278,2.9981856982,4.3268353297  
 H,0,-8.5255845751,1.033040896,3.274388943  
 H,0,-7.4190536094,-0.117006834,1.3611030414  
 H,0,-7.0620889871,1.8825210797,-0.9579164713  
 H,0,-6.095558809,2.1676630529,-2.4323040021  
 H,0,-5.6472378329,2.9737414171,-0.903290844  
 H,0,-5.5248391521,0.1564719704,-3.7156679455  
 H,0,-4.1584448307,1.286130088,-3.6483397949  
 H,0,-3.8661760997,-0.4626087108,-3.7461443643  
 H,0,-2.2014987769,2.4855253906,-2.2377487842  
 H,0,-2.611674342,4.6489033269,-1.1161440244  
 H,0,-1.1130019254,5.4008992315,0.7330706217  
 H,0,0.7947181987,3.9778086596,1.3971090161  
 H,0,2.0643064363,2.184607295,1.2921933946  
 H,0,6.4133596722,2.0934223086,2.7673701245  
 H,0,8.7906011275,2.8098932946,2.7712850194  
 H,0,10.4489321303,1.6300054698,1.3474800089  
 H,0,9.7122696815,-0.2472545944,-0.1040146656  
 H,0,7.3260781349,-0.920002075,-0.1513298439  
 H,0,6.6216857249,-2.0747291893,1.9577325024  
 H,0,5.3127513542,-3.1476712488,1.4532762289  
 H,0,5.1030893316,-2.1095557614,2.8967061232  
 H,0,3.4704902136,-3.0528260524,-0.3107806807  
 H,0,2.8451489192,-2.9431254907,1.3429696171  
 H,0,1.9575613617,-2.1799447958,0.0280505582

Sum of electronic and zero-point Energies= -5448.065590  
 Sum of electronic and thermal Energies= -5448.018391  
 Sum of electronic and thermal Enthalpies= -5448.017447  
 Sum of electronic and thermal Free Energies= -5448.152403

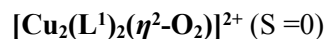

Cu,0,-1.5230309563,-0.452365967,-1.3579004066  
 O,0,-0.2432188563,-1.8532903935,-1.0307005145  
 O,0,-4.3923272796,-1.3300765227,1.381470704  
 N,0,-3.0192778965,-1.5693499918,-1.2865177649  
 N,0,-5.4297016665,0.4671701733,0.326304717  
 N,0,-5.3776802919,0.9869058178,-0.9590596204  
 C,0,-0.5052758709,-3.099694929,-1.1636124077  
 C,0,0.5216148764,-4.010087511,-1.5340230075  
 C,0,0.3075557272,-5.358447019,-1.4099034941  
 C,0,-0.9441171809,-5.8844030701,-0.9850703628  
 C,0,-1.9872553578,-5.0416668456,-0.7156311919  
 C,0,-1.8242314835,-3.6348781762,-0.8606230685  
 C,0,-2.9545318051,-2.8213545907,-0.814651481  
 C,0,-3.9340273739,-0.6771939248,-0.9151184341  
 C,0,-4.5782129621,-0.6115726023,0.4206050335  
 C,0,-4.5228290079,0.3469802992,-1.7275119253  
 C,0,-6.2724396787,0.9984771837,1.3473468934  
 C,0,-5.8031964173,2.0470619676,2.1370057112  
 C,0,-6.6208725783,2.5447029766,3.1461166403  
 C,0,-7.8820309037,1.9902970613,3.3592664019  
 C,0,-8.3352267588,0.9369060413,2.5668866518  
 C,0,-7.529917698,0.4329070943,1.5506847889  
 C,0,-6.2527271138,2.0854590275,-1.3177850082  
 C,0,-4.3284640209,0.6068058816,-3.1725539517  
 Cu,0,1.5213756682,-0.0745118756,-1.6331183258  
 O,0,-0.139650622,0.8740165632,-1.5996661272  
 O,0,4.7273844711,2.2585711041,0.6930012616  
 N,0,2.2646978513,0.6641693578,-0.02360566  
 N,0,5.6067661416,0.153722321,1.1815602117  
 N,0,5.1601932405,-1.1565103117,1.0522764721  
 C,0,-0.2313858079,2.0978540003,-1.0414243595

C,0,-1.2682271911,2.9432469536,-1.4461716904  
 C,0,-1.4210632665,4.2021216796,-0.8822386357  
 C,0,-0.5352707098,4.6533355016,0.0993110882  
 C,0,0.5062005095,3.8330608213,0.492424405  
 C,0,0.6912248622,2.5521150361,-0.0667438052  
 C,0,1.8255908444,1.8078083247,0.4144572935  
 C,0,3.4702043596,0.1846926925,0.4920908143  
 C,0,4.6041105153,1.0403927603,0.7896592782  
 C,0,3.8423442424,-1.1203540356,0.703891563  
 C,0,6.9910140536,0.4436492169,1.0984200309  
 C,0,7.4869052737,1.5410070727,1.8030657646  
 C,0,8.8390844302,1.8550437007,1.7097721147  
 C,0,9.6958096186,1.0693276235,0.9411832897  
 C,0,9.1919024469,-0.0293514721,0.2480723847  
 C,0,7.8370901777,-0.3404890745,0.3114232759  
 C,0,5.6839056756,-2.1263897308,2.0056995876  
 C,0,3.0168518734,-2.3524798447,0.6776026549  
 O,0,2.751508513,-1.1433239272,-2.4430031852  
 O,0,1.6804930681,-1.0078802977,-3.2256021879  
 H,0,1.4815219633,-3.6010354533,-1.8294968217  
 H,0,1.1170410219,-6.0467798124,-1.6338456057  
 H,0,-1.0742934803,-6.9580341336,-0.9083197063  
 H,0,-2.9626335177,-5.4320805932,-0.4422915735  
 H,0,-3.8946758435,-3.2608728674,-0.4842626743  
 H,0,-4.8143266247,2.4585100897,1.9601637008  
 H,0,-6.2704233299,3.3616482655,3.7683545331  
 H,0,-8.5150434844,2.3802905268,4.150304096  
 H,0,-9.3160841945,0.5059489315,2.7390232797  
 H,0,-7.8632694956,-0.3876026282,0.923247358  
 H,0,-7.2918481498,1.7670128031,-1.2151329691  
 H,0,-6.0464022276,2.3620759267,-2.3484889628  
 H,0,-6.0557139011,2.9316109346,-0.6575041359  
 H,0,-5.2575697933,0.4157097,-3.7182729914  
 H,0,-4.0246310729,1.6397481341,-3.3612134875  
 H,0,-3.561109231,-0.0615549246,-3.5653090147  
 H,0,-1.9370956053,2.6015748087,-2.2286449961  
 H,0,-2.2325647011,4.839913681,-1.2191269215  
 H,0,-0.6549942666,5.6365915083,0.5406679476  
 H,0,1.2114065103,4.1743712099,1.245062377  
 H,0,2.3847047996,2.2761394064,1.2238490543  
 H,0,6.8148441836,2.1372937901,2.4091091296  
 H,0,9.2256970864,2.7118739741,2.2532730099  
 H,0,10.752300389,1.3122984072,0.8824155486  
 H,0,9.8517021971,-0.6425369034,-0.3582340896  
 H,0,7.4321340037,-1.17673591,-0.2502445227  
 H,0,6.7725982548,-2.0831905627,1.9986910837  
 H,0,5.3786286675,-3.1214780523,1.6842200055  
 H,0,5.3139000022,-1.9284294657,3.0173415729  
 H,0,3.4567692431,-3.111901344,0.0255104103  
 H,0,2.9233719364,-2.7787545253,1.6821323325  
 H,0,2.0122209757,-2.1201610619,0.3237606167

Sum of electronic and zero-point Energies= -5448.041354  
 Sum of electronic and thermal Energies= -5447.994650  
 Sum of electronic and thermal Enthalpies= -5447.993705  
 Sum of electronic and thermal Free Energies= -5448.126709

**[Cu<sub>2</sub>(L<sup>1</sup>)(L<sup>2</sup>)]<sup>+</sup> (S =1)**

Cu,0,2.2454026568,1.6890812348,-0.060068512  
 O,0,3.2017426206,3.0535700654,0.8089473929  
 O,0,3.971619337,-2.0716526787,1.2609433058  
 N,0,3.681280148,0.4958799969,-0.3111800162  
 N,0,2.6994655632,-2.9459086761,-0.4921948934  
 N,0,2.280591443,-2.4697696448,-1.7292823068  
 C,0,4.4836307239,3.0292129865,1.0412190294  
 C,0,5.0941780951,4.1993657709,1.5535640538  
 C,0,6.4300333872,4.2149094408,1.8938296419  
 C,0,7.2421612864,3.0764349677,1.7271478302  
 C,0,6.6843780669,1.9333196938,1.2068066728  
 C,0,5.3163902535,1.8791094845,0.8375257557  
 C,0,4.8516167968,0.6740818036,0.2476636291  
 C,0,3.2336351001,-0.7693870222,-0.6532893845  
 C,0,3.3751832675,-1.9393071554,0.1981586432  
 C,0,2.5545654006,-1.1451301181,-1.7992100197  
 C,0,2.9402523789,-4.3303905602,-0.3041068969

C,0,2.7103827161,-4.8790719725,0.957300646  
 C,0,2.9738992456,-6.2285790494,1.1700371412  
 C,0,3.4387438434,-7.0296566738,0.1288187552  
 C,0,3.6570480183,-6.4730356545,-1.1298318199  
 C,0,3.4229750229,-5.1191910012,-1.3501310951  
 C,0,1.0743458154,-3.0552824454,-2.3048826382  
 C,0,2.1340342901,-0.3121741175,-2.9537019213  
 Cu,0,-0.6213933631,0.3450604564,-0.0479607764  
 O,0,0.31910696,1.9777950253,-0.2475472369  
 O,0,-5.4619869706,1.4275639766,-0.4063114142  
 N,0,-2.4162027887,1.0119351682,-0.2707339239  
 N,0,-5.4788337387,-0.8197005911,0.1957562428  
 N,0,-4.5173077497,-1.7502200114,0.5742349353  
 C,0,-0.2431272028,3.1253463783,-0.6733826495  
 C,0,0.5819991611,4.226623477,-0.92546877  
 C,0,0.0551230063,5.4342288692,-1.3593224773  
 C,0,-1.3205039698,5.5811497126,-1.5509915134  
 C,0,-2.1469288626,4.5038280083,-1.296500494  
 C,0,-1.645371438,3.2590408469,-0.8581405665  
 C,0,-2.6393350877,2.2399573402,-0.6291614776  
 C,0,-3.4417579316,0.1007397724,-0.0640040207  
 C,0,-4.8635016359,0.3841585339,-0.1459574521  
 C,0,-3.292564171,-1.2092832705,0.3366852685  
 C,0,-6.7961077845,-0.9083910132,0.7118098143  
 C,0,-7.8546689335,-0.471439679,-0.0844147379  
 C,0,-9.1512031848,-0.5244102362,0.4178297754  
 C,0,-9.3941741473,-1.0316053931,1.6928415248  
 C,0,-8.3305087585,-1.4738539479,2.4769342435  
 C,0,-7.0261887936,-1.402304481,1.9975989805  
 C,0,-4.8242585478,-3.1558013106,0.3425338489  
 C,0,-2.0416217656,-2.0291427521,0.5205253178  
 O,0,-0.8882157707,-1.4272476118,0.0534941639  
 H,0,4.4666261003,5.073456054,1.694235593  
 H,0,6.8610097141,5.125125726,2.3019602973  
 H,0,8.2912809285,3.1055231461,2.0002824125  
 H,0,7.2930088732,1.0450746722,1.0581068876  
 H,0,5.542756564,-0.1694415702,0.2320851825  
 H,0,2.3336755088,-4.2498392172,1.7555760457  
 H,0,2.8010616479,-6.6571927055,2.1525140208  
 H,0,3.6305814229,-8.0847991821,0.2976331923  
 H,0,4.0253337682,-7.0898388796,-1.9439092894  
 H,0,3.6202354472,-4.6720769409,-2.3197305405  
 H,0,1.1674895701,-4.1406354373,-2.3079793967  
 H,0,0.9900042604,-2.7135632904,-3.3360868112  
 H,0,0.1966344829,-2.7464979336,-1.7258129281  
 H,0,2.4283936449,-0.7805238951,-3.8968971096  
 H,0,1.0488262159,-0.165359876,-2.9739733157  
 H,0,2.6135416524,0.6665318274,-2.8931851161  
 H,0,1.6515131586,4.1268052398,-0.7586315248  
 H,0,0.7255488472,6.2677917581,-1.5460684828  
 H,0,-1.7353697145,6.524546878,-1.8889250061  
 H,0,-3.2202897432,4.6014148506,-1.4343235673  
 H,0,-3.6815788346,2.5329954417,-0.7684761763  
 H,0,-7.655489122,-0.0938414081,-1.0806917974  
 H,0,-9.976209448,-0.179862958,-0.1982762128  
 H,0,-10.4093382144,-1.0826813313,2.0743081027  
 H,0,-8.5117201636,-1.8648986082,3.4735082194  
 H,0,-6.1895470668,-1.7184019849,2.6132767106  
 H,0,-5.8268334288,-3.3642664148,0.714077544  
 H,0,-4.1212110461,-3.7631201457,0.9118286432  
 H,0,-4.7672231017,-3.4067906499,-0.721785708  
 H,0,-2.1868181614,-2.9858301533,-0.0069800757  
 H,0,-1.9756157703,-2.2755589539,1.5953106084

Sum of electronic and zero-point Energies= -5372.632671  
 Sum of electronic and thermal Energies= -5372.588592  
 Sum of electronic and thermal Enthalpies= -5372.587648  
 Sum of electronic and thermal Free Energies= -5372.716310

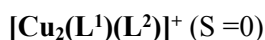

Cu,0,2.0258162674,1.8617715949,-0.0609444945  
 O,0,3.2368624374,3.191364986,0.568690063  
 O,0,3.4327886653,-2.1669304865,1.418256516  
 N,0,3.2203256442,0.4020769672,-0.1925748719  
 N,0,2.1918322882,-3.0291903849,-0.3604281764

N,0,1.7920050414,-2.5404507439,-1.5941815719  
C,0,4.4834757699,2.9704197745,0.8150957003  
C,0,5.3343971364,4.0737746429,1.0947305917  
C,0,6.6381759465,3.8792988597,1.4852517269  
C,0,7.1936337697,2.5832046119,1.5743055903  
C,0,6.4168119091,1.4990786804,1.2524179666  
C,0,5.0627161823,1.6524797165,0.8501400807  
C,0,4.4011511145,0.4906502132,0.3923542994  
C,0,2.7336392783,-0.8488044442,-0.5005573409  
C,0,2.8539300473,-2.0226143521,0.3469625957  
C,0,2.049229157,-1.2185959694,-1.6486978041  
C,0,2.4499042671,-4.4131988837,-0.1863992236  
C,0,2.1771402193,-4.9875265845,1.0544863258  
C,0,2.4548293186,-6.3361770633,1.2549435912  
C,0,2.9755026304,-7.1104138381,0.2199219531  
C,0,3.2360992564,-6.5281854336,-1.0190046828  
C,0,2.9888857672,-5.1745413817,-1.2252486532  
C,0,0.6359601077,-3.1449409502,-2.2355374459  
C,0,1.5926202413,-0.3701698831,-2.7723255224  
Cu,0,-0.3138424738,1.000583739,-0.0240826198  
O,0,0.3263256342,2.7040517885,-0.0949860022  
O,0,-5.2614844431,1.3189462028,-0.534304815  
N,0,-2.2001305922,1.4122574147,-0.2207793892  
N,0,-4.934238437,-0.8935870667,0.1186368748  
N,0,-3.8529483081,-1.6427744295,0.5734976456  
C,0,-0.3215972442,3.7759596728,-0.5697866596  
C,0,0.4023014576,4.9433797324,-0.8193984807  
C,0,-0.246039012,6.0839148192,-1.2720957948  
C,0,-1.6275112629,6.0831808389,-1.4835124443  
C,0,-2.3473851999,4.9284137872,-1.2382017389  
C,0,-1.7256579214,3.7478536382,-0.7816533767  
C,0,-2.5802606143,2.6027364932,-0.57252595  
C,0,-3.0756149544,0.3580856036,-0.0421229473  
C,0,-4.5157808565,0.3943639055,-0.2140537103  
C,0,-2.7285997348,-0.8980066086,0.4038392745  
C,0,-6.2483544145,-1.2049297672,0.550412535  
C,0,-7.3108501958,-0.9658247225,-0.3208971693  
C,0,-8.6094368348,-1.2361794544,0.0993699381  
C,0,-8.8455885682,-1.763818914,1.3673138587  
C,0,-7.7761485093,-2.0077275691,2.2267371227  
C,0,-6.4746255035,-1.7172949464,1.8296200082  
C,0,-3.9070146516,-3.0820824785,0.3422996292  
C,0,-1.3536262243,-1.4233573331,0.7377891863  
O,0,-0.3297562252,-0.8044094874,0.0333484138  
H,0,4.9008927504,5.0669520089,1.0393016153  
H,0,7.2529189681,4.740930443,1.7307296654  
H,0,8.2266896419,2.4515933052,1.8769363684  
H,0,6.8351097069,0.4965298172,1.2849640929  
H,0,4.9628220598,-0.4401855604,0.4727924374  
H,0,1.7560019061,-4.3786115927,1.8465064913  
H,0,2.2489570623,-6.7853445134,2.2216867809  
H,0,3.1778208202,-8.1652347098,0.3780761819  
H,0,3.6476340804,-7.1244192226,-1.8276322434  
H,0,3.2175553775,-4.7073369325,-2.1784120955  
H,0,0.7069541918,-4.2290717787,-2.1642625376  
H,0,0.6367050244,-2.8640360795,-3.288302643  
H,0,-0.2800796177,-2.7885198945,-1.7535387693  
H,0,1.8097351055,-0.8365598898,-3.7368969647  
H,0,0.5107410444,-0.2019008755,-2.7136972467  
H,0,2.0979161002,0.5963756973,-2.7375277176  
H,0,1.4730782852,4.9323746681,-0.6407432084  
H,0,0.3331330804,6.983106611,-1.4598251148  
H,0,-2.1310272867,6.9766779578,-1.8363330509  
H,0,-3.4215767344,4.9140179134,-1.4003480056  
H,0,-3.6511575316,2.7510872733,-0.7352304491  
H,0,-7.1141119654,-0.5703316671,-1.3107388459  
H,0,-9.4387041048,-1.04567651,-0.5750906183  
H,0,-9.8599808339,-1.9847454829,1.6849077626  
H,0,-7.9531716023,-2.4134815718,3.2181538221  
H,0,-5.6387571453,-1.8778194187,2.5037621391  
H,0,-4.8915133525,-3.447055282,0.6322013896  
H,0,-3.1689057514,-3.56775091,0.9792141308  
H,0,-3.7203428818,-3.323077858,-0.7091582174  
H,0,-1.3267755849,-2.5003925089,0.5188606549  
H,0,-1.2301281856,-1.3295079424,1.8309235941

Sum of electronic and zero-point Energies=

-5372.604800

Sum of electronic and thermal Energies= -5372.560704  
Sum of electronic and thermal Enthalpies= -5372.559760  
Sum of electronic and thermal Free Energies= -5372.687411

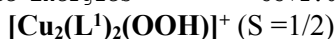

Cu,0,2.2230680876,-2.5409183938,-0.344225339  
O,0,3.1255682819,-3.7372478827,-1.3865335225  
O,0,3.1318868382,1.3738835311,-1.8102118043  
N,0,3.5981081363,-1.1660203073,-0.2773662998  
N,0,2.4769862559,2.18507141,0.28275364  
N,0,2.5820127318,1.734242742,1.5999445731  
C,0,4.3090548534,-3.5803652218,-1.9186296428  
C,0,4.8574188011,-4.6439035394,-2.6685762902  
C,0,6.0896279569,-4.52168983,-3.2789204339  
C,0,6.8433293666,-3.3391909289,-3.1740960577  
C,0,6.3345452871,-2.2908310348,-2.4426816138  
C,0,5.0781898469,-2.3816531489,-1.7949735082  
C,0,4.6534457031,-1.2498700714,-1.0412186966  
C,0,3.2336092604,0.0772492231,0.2403376983  
C,0,2.9595155427,1.2221712631,-0.6057682426  
C,0,2.9800113569,0.4192557875,1.5397531923  
C,0,2.2900259782,3.5449741325,-0.0144916245  
C,0,1.6345137871,3.8777089404,-1.2121191199  
C,0,1.397832488,5.2200359421,-1.5134222098  
C,0,1.7918628724,6.2220047701,-0.6320477522  
C,0,2.4541589935,5.8796154817,0.5461539604  
C,0,2.7139067829,4.5492602746,0.8590152873  
C,0,1.4903095753,2.099718957,2.5024222419  
C,0,3.076985459,-0.4143838891,2.7626729019  
Cu,0,-0.1215968265,-0.3369271519,-0.387501777  
O,0,0.6570383459,-1.8868711269,0.5226259713  
O,0,-4.7475832282,-1.0285613102,1.0180279181  
N,0,-1.8415241353,-0.22733085,0.7933842116  
N,0,-5.1102358546,0.9519676017,-0.139040891  
N,0,-4.3109748375,1.9244849302,-0.7249543716  
C,0,0.2118484256,-2.398194714,1.678544881  
C,0,0.96527826,-3.4067523529,2.3017490423  
C,0,0.5812262677,-3.9792285172,3.5031849168  
C,0,-0.5965183998,-3.5686710455,4.1307743207  
C,0,-1.3618840645,-2.5924681457,3.5231294369  
C,0,-0.995666934,-1.976003196,2.3056878375  
C,0,-1.96436841,-1.0122670649,1.8175143043  
C,0,-2.954408733,0.505997617,0.3957650144  
C,0,-4.3288358362,0.0103349771,0.5170840722  
C,0,-3.0151769342,1.6633632555,-0.3373929571  
C,0,-6.4045055636,0.7032782168,-0.6550379594  
C,0,-7.3878750066,0.2106722735,0.2042329407  
C,0,-8.6569958248,-0.0581291404,-0.2981963543  
C,0,-8.9537952663,0.1833269768,-1.6382866901  
C,0,-7.9674298732,0.6842800404,-2.485162522  
C,0,-6.6865378994,0.9354237012,-2.0031194006  
C,0,-4.8453812785,3.2857774656,-0.6623699259  
C,0,-2.0107502588,2.6993746345,-0.7201968684  
O,0,-0.264499396,1.246485032,-1.4892542444  
O,0,-0.6682802221,2.2299880117,-0.4752345246  
H,0,4.2733881759,-5.5543223249,-2.7566960623  
H,0,6.4796882638,-5.3573243048,-3.853648081  
H,0,7.8085186176,-3.2566863088,-3.6616622849  
H,0,6.8992812597,-1.3670657765,-2.345254013  
H,0,5.2949810962,-0.3680970699,-1.0948794048  
H,0,1.4044625456,3.0916565941,-1.9293745787  
H,0,0.9024842784,5.4735970341,-2.4456031318  
H,0,1.5971271937,7.2636735129,-0.8652282371  
H,0,2.7825137135,6.6565005699,1.2298516675  
H,0,3.2556483679,4.2888134828,1.7623425275  
H,0,1.3744460911,3.1824254546,2.5219366269  
H,0,1.7585746179,1.7696154861,3.5054768989  
H,0,0.5468354391,1.6327448081,2.1968504044  
H,0,3.6310465905,0.1089769681,3.5469375699  
H,0,2.0874029576,-0.6682507304,3.1562211983  
H,0,3.5978013365,-1.344371196,2.5301999467  
H,0,1.8847408071,-3.742079053,1.8238978916  
H,0,1.2023507397,-4.7512183298,3.9475378819  
H,0,-0.9114687002,-4.0127825258,5.0688062018  
H,0,-2.2908520885,-2.2751439914,3.9900720573  
H,0,-2.8887677949,-0.9857262915,2.3961820509

H,0,-7.1514740152,0.037396768,1.2473122202  
H,0,-9.4214827108,-0.4466620943,0.3678659243  
H,0,-9.9496573512,-0.0179002346,-2.0209495049  
H,0,-8.1882402979,0.8698328169,-3.5319697735  
H,0,-5.9050355233,1.2987485955,-2.6631099209  
H,0,-5.8596997933,3.2807399742,-1.0602041524  
H,0,-4.2429781313,3.9326754371,-1.3009934214  
H,0,-4.8539811433,3.6677555848,0.3642102224  
H,0,-2.085592126,2.9579162398,-1.7796142398  
H,0,-2.1032955888,3.6017097488,-0.1050294064  
H,0,-0.0190075871,2.9769828305,-0.613612796

Sum of electronic and zero-point Energies= -5448.240947  
Sum of electronic and thermal Energies= -5448.195620  
Sum of electronic and thermal Enthalpies= -5448.194676  
Sum of electronic and thermal Free Energies= -5448.323264

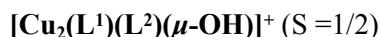

Cu,0,-0.2335965734,0.460439006,-1.8101714885  
O,0,0.2976929063,2.0283074152,-0.9300207378  
O,0,2.8105587943,-2.8265117315,-0.6935936892  
N,0,1.5791768926,-0.3148718575,-1.8784297793  
N,0,2.343048001,-3.7115448317,-2.8028583725  
N,0,1.9212046573,-3.1880138608,-4.023422335  
C,0,1.4389079405,2.2597312889,-0.3456525693  
C,0,1.5946923643,3.4629981543,0.3840924201  
C,0,2.7727896454,3.7544361271,1.041077095  
C,0,3.8665697302,2.8707546118,1.0038479644  
C,0,3.7468993356,1.6997705644,0.2900489964  
C,0,2.5536298742,1.367754192,-0.3954809049  
C,0,2.5525955829,0.155953781,-1.1466381401  
C,0,1.7893703346,-1.5534005044,-2.4990333889  
C,0,2.3607228811,-2.7076321361,-1.8313874823  
C,0,1.5193658566,-1.894542949,-3.7966287486  
C,0,3.1939926608,-4.8411008377,-2.7832984126  
C,0,3.1830382026,-5.6696485998,-1.6594053812  
C,0,4.0302139849,-6.7722556285,-1.6160312525  
C,0,4.8665434193,-7.0658614875,-2.6915689341  
C,0,4.8640644595,-6.2385537164,-3.8125127275  
C,0,4.0397941175,-5.1182836053,-3.8601288785  
C,0,1.1118230343,-4.0785904399,-4.8493924417  
C,0,0.8956924122,-1.0862044853,-4.873652446  
Cu,0,-3.0237584198,-0.608360411,-2.0420260297  
O,0,-2.1960975113,1.1774350237,-1.9752124001  
O,0,-7.6955122564,0.9263074137,-0.7588480276  
N,0,-4.8283176499,0.2017476366,-1.6966929552  
N,0,-7.7421110547,-1.3376652692,-0.3021256098  
N,0,-6.8489638125,-2.377603884,-0.4240762947  
C,0,-2.7356696845,2.3070581902,-2.3234428338  
C,0,-1.9284002036,3.4059966643,-2.6949628275  
C,0,-2.5006104173,4.6052124932,-3.0516097497  
C,0,-3.9043288016,4.7818094577,-3.0650639558  
C,0,-4.7123080001,3.7350482423,-2.7103179483  
C,0,-4.1685455239,2.4716947813,-2.3383566664  
C,0,-5.0954135016,1.4715754632,-1.9850452925  
C,0,-5.8068692516,-0.5832196311,-1.1939285018  
C,0,-7.1534157028,-0.1709184793,-0.7516061887  
C,0,-5.6976056843,-1.9699735753,-0.9448324982  
C,0,-9.0539789798,-1.4875839366,0.2326027532  
C,0,-10.118359882,-1.7269007976,-0.6353078141  
C,0,-11.4006084734,-1.8534878707,-0.1103105574  
C,0,-11.6065862138,-1.7396534724,1.2635977494  
C,0,-10.5347872401,-1.4958779828,2.1208208136  
C,0,-9.2482758371,-1.3658782082,1.6076045883  
C,0,-7.2039338562,-3.6929437567,0.0664216114  
C,0,-4.4859299797,-2.8433574154,-1.1387281798  
O,0,-3.6287948187,-2.3762079164,-2.1005396938  
O,0,-1.2031090861,-1.0446567837,-2.4965586612  
H,0,0.7497791907,4.14402963,0.4162838334  
H,0,2.8531381553,4.6846871427,1.5974876576  
H,0,4.7872676303,3.1109640053,1.5246157041  
H,0,4.5805857088,1.0033323278,0.2386235691  
H,0,3.4768513875,-0.4235184107,-1.1147553663  
H,0,2.5213056933,-5.4403733393,-0.8326354809



H,0,4.0250583422,-7.4129091418,-0.7391698236  
H,0,5.5165291458,-7.9347884274,-2.6563541948  
H,0,5.5166467316,-6.4552801841,-4.6530105946  
H,0,4.055869116,-4.4529077822,-4.7176317735  
H,0,1.6627411525,-5.0015421759,-5.0303969907  
H,0,0.935973288,-3.590415782,-5.8076333456  
H,0,0.154560733,-4.309085208,-4.3683084752  
H,0,1.4275943175,-1.2163112484,-5.8198314527  
H,0,-0.1525990351,-1.3661816858,-5.015974911  
H,0,0.9241288999,-0.0298006362,-4.6014134475  
H,0,-0.8525827727,3.277013041,-2.6613853409  
H,0,-1.857956967,5.4362792682,-3.3280592548  
H,0,-4.3301445473,5.7367047311,-3.3524942186  
H,0,-5.7926243608,3.8487423283,-2.7121495684  
H,0,-6.1406435371,1.776444654,-1.9440440403  
H,0,-9.936554632,-1.8096620346,-1.7021611448  
H,0,-12.2381113635,-2.0397474075,-0.7748516474  
H,0,-12.6090628157,-1.8389203663,1.6685241964  
H,0,-10.6995983517,-1.4034154702,3.1894713057  
H,0,-8.4016104702,-1.1684521053,2.2575846453  
H,0,-7.2007420501,-3.6950399737,1.1590329178  
H,0,-6.4706122675,-4.4053289755,-0.303631154  
H,0,-8.1954527566,-3.9583230773,-0.3017196833  
H,0,-4.8332645583,-3.8550087292,-1.409199228  
H,0,-0.929566374,-1.9209341315,-2.2081707495  
H,0,-4.0197013044,-2.9479187762,-0.138355138

Sum of electronic and zero-point Energies= -5448.372793  
Sum of electronic and thermal Energies= -5448.326726  
Sum of electronic and thermal Enthalpies= -5448.325782  
Sum of electronic and thermal Free Energies= -5448.459723

### [Cu<sub>2</sub>(μ-O)(L<sup>2</sup>)(L<sup>3</sup>)]<sup>+</sup> (S=1)

Cu,0,-0.7626772647,0.2223492804,-1.2574980475  
Cu,0,2.3427292921,1.174750931,-0.3467844226  
O,0,0.4019300532,1.6894605541,-0.5465354724  
O,0,-5.1882773944,1.6797795353,0.8353060436  
O,0,-1.7441681081,-1.0738278475,-2.1656892211  
O,0,3.5205895345,2.3691703494,0.7309664019  
O,0,0.9723957013,-0.2967875701,-2.4191326801  
O,0,0.2781457128,-1.2663879062,0.2061048835  
N,0,-2.4053804436,1.0408409503,-0.4164121677  
N,0,-5.5514134116,-0.5300572675,0.2703610852  
N,0,-4.8171307763,-1.513000142,-0.3487438715  
N,0,3.7466780654,0.0230553062,-0.9380612325  
N,0,2.3776190662,-2.2892245235,-0.0015764987  
N,0,3.4258393641,-2.3440425877,-0.9814336435  
C,0,-0.0046686107,2.9096028619,-0.2894818305  
C,0,0.9407489033,3.9523076555,-0.1808149152  
C,0,0.5497167314,5.2454320233,0.0852099896  
C,0,-0.8092146303,5.5815412265,0.272253549  
C,0,-1.7500206993,4.5910078622,0.1938024926  
C,0,-1.3949842405,3.2394302687,-0.091112661  
C,0,-2.4664898718,2.3258180157,-0.0951925528  
C,0,-3.5109069041,0.2727992025,-0.2830470624  
C,0,-4.7994456005,0.6304674773,0.3415797602  
C,0,-3.6108698403,-1.0757697398,-0.6889962054  
C,0,-6.90224637,-0.702961947,0.6898074296  
C,0,-7.1610753413,-1.0444750714,2.0159980637  
C,0,-8.4818031603,-1.1906170392,2.4286092375  
C,0,-9.5218657011,-0.9969909911,1.521203777  
C,0,-9.2502492119,-0.6513663409,0.1982674859  
C,0,-7.9341543225,-0.4976974757,-0.2252415575  
C,0,-5.3825811661,-2.8373979811,-0.5072223119  
C,0,-2.5448408263,-1.8780709603,-1.3892741032  
C,0,4.782687444,2.168783938,0.903546972  
C,0,5.518338338,3.0853812081,1.7119939437  
C,0,6.8626115199,2.9284508581,1.9579648151  
C,0,7.583700286,1.843116894,1.4174258107  
C,0,6.9149702696,0.9380706651,0.6300721074  
C,0,5.5300264131,1.0651345774,0.3437858839  
C,0,4.9699107175,0.0605350687,-0.4941020892  
C,0,3.2777778886,-1.0890690145,-1.7479060459  
C,0,1.776895094,-0.8038623515,-1.6378390194

C,0,1.3609816611,-1.4761489143,-0.3501618572  
 C,0,3.8582769086,-1.1198347481,-3.1414987094  
 C,0,2.5603397689,-2.9874605882,1.2132586299  
 C,0,1.4703469645,-3.2519354833,2.0501032946  
 C,0,1.6858946284,-3.927128561,3.2466475501  
 C,0,2.9636624284,-4.3471777192,3.6094818358  
 C,0,4.0389098955,-4.0851658433,2.7633712417  
 C,0,3.846555321,-3.4082122281,1.5646061798  
 C,0,3.2747561589,-3.5763459649,-1.7619293852  
 H,0,1.99246291,3.7056249732,-0.2936217051  
 H,0,1.3067420047,6.0214231821,0.1528447416  
 H,0,-1.0969657533,6.6056551873,0.4817358007  
 H,0,-2.8010565896,4.8194178498,0.3453603987  
 H,0,-3.4386052592,2.7209077661,0.1977534828  
 H,0,-6.3365871614,-1.1891552469,2.7068004488  
 H,0,-8.6973293889,-1.4554147234,3.4587202452  
 H,0,-10.550815475,-1.1131673627,1.8475530261  
 H,0,-10.0628369564,-0.4963418713,-0.5041155712  
 H,0,-7.7025119,-0.2190929505,-1.2486375327  
 H,0,-5.6180098793,-3.2490872629,0.4762316931  
 H,0,-6.2905877447,-2.7784446388,-1.1099085494  
 H,0,-4.6480432394,-3.4678765779,-1.0005924575  
 H,0,-3.0336503362,-2.6362006558,-2.021136042  
 H,0,-1.9888487675,-2.4344406328,-0.6109569066  
 H,0,4.9658713687,3.919400588,2.13505134  
 H,0,7.3770030787,3.6542109279,2.5832923506  
 H,0,8.6429936019,1.7278692228,1.6209787335  
 H,0,7.4491397608,0.0927460298,0.2010414159  
 H,0,5.6417457034,-0.7514842364,-0.7903818534  
 H,0,4.9263838307,-1.3500649842,-3.1094290384  
 H,0,3.3530076022,-1.8495486675,-3.7766984701  
 H,0,3.7293656334,-0.1300332741,-3.5839420505  
 H,0,0.4765987141,-2.9291769432,1.7679966929  
 H,0,0.8404009746,-4.1302618484,3.8968810857  
 H,0,3.1197031136,-4.8777789955,4.5435597906  
 H,0,5.0395800183,-4.4069720213,3.0352747148  
 H,0,4.6779240547,-3.1937225536,0.903209654  
 H,0,2.3393194001,-3.6156631989,-2.3374701206  
 H,0,4.1278227303,-3.6691929091,-2.434543767  
 H,0,3.2978137162,-4.419304074,-1.0689924501

Sum of electronic and zero-point Energies= -5447.744451  
 Sum of electronic and thermal Energies= -5447.699440  
 Sum of electronic and thermal Enthalpies= -5447.698496  
 Sum of electronic and thermal Free Energies= -5447.828449

**[Cu<sub>2</sub>(μ-O)(L<sup>2</sup>)(L<sup>3</sup>)]<sup>+</sup> (S=0)**

Cu,0,-0.7365340262,0.4926207938,-1.5437321728  
 Cu,0,2.200247954,1.1635789865,-0.2480947867  
 O,0,0.3121926136,1.7490907867,-0.5425727579  
 O,0,-4.5795576749,1.4634887553,1.3182652788  
 O,0,-1.7314462621,-0.6639196018,-2.5856816369  
 O,0,3.2270307723,2.3086325395,0.9745836559  
 O,0,0.9951880601,-0.0239804704,-2.502950535  
 O,0,0.0208333798,-1.1990584604,-0.0588936506  
 N,0,-2.3689669867,1.2344800506,-0.7723470449  
 N,0,-5.0269200198,-0.7074984865,0.5965023837  
 N,0,-4.5259326549,-1.5301575737,-0.4045753802  
 N,0,3.6359432272,0.0597772208,-0.7851179205  
 N,0,2.111902528,-2.2575652936,-0.136165606  
 N,0,3.2445483585,-2.2824775916,-1.0144162522  
 C,0,-0.0182347244,3.0373896987,-0.5916015216  
 C,0,0.9702599903,4.0267794897,-0.7091734189  
 C,0,0.6258305013,5.3656232961,-0.6557908016  
 C,0,-0.7117343856,5.767567264,-0.5101540276  
 C,0,-1.6986698335,4.8102045014,-0.417707933  
 C,0,-1.3801314796,3.4358950736,-0.4799209091  
 C,0,-2.4426429602,2.4928305939,-0.4265460917  
 C,0,-3.3149202614,0.3294213702,-0.4244508976  
 C,0,-4.3221371301,0.4917196562,0.6185130363  
 C,0,-3.4783278528,-0.9346592382,-0.9814339217  
 C,0,-6.3443956115,-0.8766676197,1.1000145501  
 C,0,-6.547617412,-0.7652414078,2.4737901934  
 C,0,-7.8383729419,-0.8874836206,2.9792909763  
 C,0,-8.9071322762,-1.1436812343,2.1228640991

C,0,-8.689930698,-1.2617569567,0.751090592  
 C,0,-7.4089999707,-1.1136337445,0.2290728852  
 C,0,-4.7334222392,-2.9651256682,-0.3280729989  
 C,0,-2.5262459341,-1.57596105,-1.9391919037  
 C,0,4.469166198,2.0963750781,1.2582659256  
 C,0,5.1153025704,2.9741781138,2.176472232  
 C,0,6.428840647,2.8049789981,2.5481354012  
 C,0,7.2060567009,1.7468206405,2.0319533393  
 C,0,6.6253964073,0.8807604942,1.1391513044  
 C,0,5.2745104959,1.0208617542,0.7223998833  
 C,0,4.8097991936,0.0649592292,-0.2215610059  
 C,0,3.2074846941,-0.9810357002,-1.7026173514  
 C,0,1.7150676349,-0.6119926259,-1.6788003006  
 C,0,1.1552973639,-1.3824089685,-0.5090750593  
 C,0,3.8971659564,-0.9423805384,-3.0445911702  
 C,0,2.1468696247,-3.0615845898,1.0261519923  
 C,0,0.9675515909,-3.3672073022,1.7141787717  
 C,0,1.0402365729,-4.1431223404,2.8660719278  
 C,0,2.2638183543,-4.6232384156,3.3273762553  
 C,0,3.4294920714,-4.3197237475,2.6272933024  
 C,0,3.3804997082,-3.5414807229,1.476723817  
 C,0,3.1473168956,-3.4621780939,-1.8803440018  
 H,0,2.0097259853,3.7219912851,-0.7860640818  
 H,0,1.4084252043,6.1152124682,-0.7241348384  
 H,0,-0.9647959692,6.8214899821,-0.4757100024  
 H,0,-2.7403691985,5.0995893333,-0.3145841395  
 H,0,-3.4210765055,2.8409014055,-0.0900918051  
 H,0,-5.7029231122,-0.5842503153,3.1294630998  
 H,0,-8.0050654004,-0.7954198664,4.0479499854  
 H,0,-9.9102263061,-1.250952253,2.5239233034  
 H,0,-9.5213354608,-1.4551930058,0.0805243617  
 H,0,-7.2339968618,-1.1737857614,-0.8410999358  
 H,0,-4.1034000972,-3.4031485915,0.4518068996  
 H,0,-5.7819279273,-3.1707313396,-0.1177406129  
 H,0,-4.4804468433,-3.3956402295,-1.2972017961  
 H,0,-3.1113177371,-2.1104247084,-2.7086707979  
 H,0,-1.9551290115,-2.34817299,-1.3923459932  
 H,0,4.5195039454,3.7870858232,2.5809449342  
 H,0,6.8742061052,3.500120044,3.2555895935  
 H,0,8.2401313705,1.6227854938,2.3350954014  
 H,0,7.2041212559,0.0579885151,0.7248372473  
 H,0,5.5094467025,-0.7285587197,-0.5013308825  
 H,0,4.9487686269,-1.2230933232,-2.9446932657  
 H,0,3.4153679606,-1.6042244755,-3.766363047  
 H,0,3.8452554228,0.0795958077,-3.4247966572  
 H,0,0.0155616309,-2.9993943237,1.3541613945  
 H,0,0.1255409942,-4.3782867544,3.4016370447  
 H,0,2.3082672854,-5.2326260813,4.2245999091  
 H,0,4.3890655278,-4.6874471933,2.977597083  
 H,0,4.283015685,-3.2930099911,0.9302897555  
 H,0,2.2690153338,-3.4466564742,-2.5399522917  
 H,0,4.0583899124,-3.5322823128,-2.4749914689  
 H,0,3.0932247522,-4.3451747693,-1.2413291411

Sum of electronic and zero-point Energies= -5447.728387  
 Sum of electronic and thermal Energies= -5447.684017  
 Sum of electronic and thermal Enthalpies= -5447.683073  
 Sum of electronic and thermal Free Energies= -5447.809041

**[Cu<sub>2</sub>(L<sup>2</sup>)(L<sup>3</sup>)] (S=1)**

Cu,0,-0.7000816167,0.4760741328,-0.9104808298  
 Cu,0,2.215517794,1.2255046211,-0.8337484969  
 O,0,0.4084480621,2.0027835379,-0.3072294196  
 O,0,-5.1804436412,1.5820405192,1.1772486708  
 O,0,-1.5417268204,-0.937891456,-1.8940493972  
 O,0,3.465944511,2.4141895171,-0.0859461982  
 O,0,1.0193038124,0.0834610586,-1.8231520864  
 O,0,0.7210266478,-2.0575090672,-2.5445438648  
 O,0,0.3476723608,-1.3450188813,0.5207336988  
 N,0,-2.3234725772,1.1058133273,0.0305295574  
 N,0,-5.510298544,-0.5694649273,0.3699720076  
 N,0,-4.790383314,-1.4633885494,-0.4149313886  
 N,0,3.5032055673,-0.1964697362,-1.1745379253  
 N,0,2.3189280912,-2.4884666123,0.0664684062  
 N,0,3.2641337835,-2.569759593,-0.9994775044

C,0,0.0092438115,3.0873916406,0.3414825384  
 C,0,0.9151796465,4.1345891862,0.5845845704  
 C,0,0.5173493951,5.282681841,1.2496681392  
 C,0,-0.7990350532,5.4344377614,1.7015052185  
 C,0,-1.697921518,4.4115557114,1.4754023854  
 C,0,-1.3310014601,3.2270997148,0.7975719873  
 C,0,-2.378872536,2.2522613481,0.6475433418  
 C,0,-3.4512870143,0.2843193273,0.0227567711  
 C,0,-4.7494015802,0.5760845393,0.611039416  
 C,0,-3.5270969819,-0.9621492693,-0.5522004851  
 C,0,-6.9246926498,-0.5827213259,0.3294635093  
 C,0,-7.6332606307,-0.1576504929,1.4545140409  
 C,0,-9.0240553609,-0.1461652735,1.4203203887  
 C,0,-9.7078667855,-0.5772078432,0.2849963406  
 C,0,-8.9920991198,-1.0084719727,-0.8298445116  
 C,0,-7.6005784579,-1.0018503082,-0.819041961  
 C,0,-5.0203560749,-2.8790526326,-0.1431339331  
 C,0,-2.4401096969,-1.7501341428,-1.2204231566  
 C,0,4.7287921701,2.1701906894,0.1369672024  
 C,0,5.5062839127,3.1877700067,0.7432500268  
 C,0,6.8460383086,3.0064360995,1.019270064  
 C,0,7.4968060576,1.799234072,0.7097790014  
 C,0,6.7686313879,0.7913250852,0.1185913012  
 C,0,5.3948183465,0.9430001902,-0.1833139481  
 C,0,4.7419602244,-0.1662202769,-0.8082378801  
 C,0,2.9522665215,-1.3948604406,-1.8362503612  
 C,0,1.4232464631,-1.227577656,-1.6927895678  
 C,0,1.2577080923,-1.698384991,-0.2283471854  
 C,0,3.4446257228,-1.5025342974,-3.2618616294  
 C,0,2.6726394235,-3.0353363209,1.318926117  
 C,0,1.6954414092,-3.256935862,2.2965851376  
 C,0,2.0691219053,-3.7923163489,3.5247748576  
 C,0,3.3971932962,-4.1218823221,3.7873975109  
 C,0,4.3601178034,-3.9087412905,2.8040186508  
 C,0,4.0071023337,-3.3685778564,1.5717379412  
 C,0,3.1562496214,-3.877034573,-1.6557392399  
 H,0,-0.2312114188,-1.7623981407,-2.4033276253  
 H,0,1.9400413473,4.0057598938,0.252108661  
 H,0,1.2433444647,6.0730731668,1.4211420175  
 H,0,-1.1068374118,6.3350090332,2.2223548501  
 H,0,-2.7242663573,4.505628527,1.8216989595  
 H,0,-3.3311873066,2.5168493607,1.1098362642  
 H,0,-7.0930214922,0.1625813109,2.3374341926  
 H,0,-9.5751843894,0.1894576761,2.2937401891  
 H,0,-10.7934743604,-0.5774917223,0.2693281941  
 H,0,-9.5162840485,-1.3405088491,-1.7210020706  
 H,0,-7.0366968525,-1.30828164,-1.694660974  
 H,0,-6.086133369,-3.0910174497,-0.2267285105  
 H,0,-4.4954300145,-3.4661183258,-0.8960246552  
 H,0,-4.6665883774,-3.1538443092,0.8562082121  
 H,0,-2.910246927,-2.4497545824,-1.9291939911  
 H,0,-1.9493775919,-2.3711524034,-0.4468258472  
 H,0,5.0061748089,4.1203631488,0.9862749066  
 H,0,7.4045496525,3.8138190644,1.4858679828  
 H,0,8.5499988093,1.6661215146,0.9326755555  
 H,0,7.2470526504,-0.1525633324,-0.1326983857  
 H,0,5.3499055377,-1.0596462898,-0.9785013375  
 H,0,4.520625218,-1.6974716053,-3.2905335419  
 H,0,2.9132341757,-2.2875633776,-3.8008736168  
 H,0,3.2518411316,-0.5507961968,-3.7624788464  
 H,0,0.6634998526,-3.0005640818,2.0953555872  
 H,0,1.3072104757,-3.9582363745,4.280866594  
 H,0,3.6776797963,-4.5442227388,4.7474324419  
 H,0,5.3991472059,-4.1626265128,2.9926716289  
 H,0,4.7525242578,-3.1968173111,0.8037818929  
 H,0,2.1751096684,-4.0445977231,-2.1142284387  
 H,0,3.9405875111,-3.9556778863,-2.4097471724  
 H,0,3.3424233036,-4.6439544512,-0.9004779459

Sum of electronic and zero-point Energies= -5523.728057  
 Sum of electronic and thermal Energies= -5523.683728  
 Sum of electronic and thermal Enthalpies= -5523.682783  
 Sum of electronic and thermal Free Energies= -5523.808225

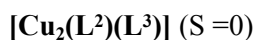

Cu,0,13.0466021708,15.1325824229,7.6267137501  
Cu,0,12.5923378047,12.1451912689,6.7719249329  
O,0,13.0482068967,14.013572878,5.9874370277  
O,0,15.3825687385,19.2718105934,6.0098323841  
O,0,12.6582884889,15.9682038695,9.2909026535  
O,0,12.8304961086,10.8830065019,5.3829178452  
O,0,12.3190467389,13.4397756061,8.1853032895  
O,0,11.9891623645,13.7249078165,10.4345895035  
O,0,14.9326384101,13.6858396803,9.2996681832  
N,0,13.905797468,16.6429193492,6.7418678557  
N,0,15.3880935675,19.5342096177,8.3173338524  
N,0,14.8006176993,18.8842461853,9.3964679242  
N,0,12.4716289159,10.8915246548,8.2508177592  
N,0,14.3456848787,11.6814997977,10.3174919375  
N,0,13.1608622268,10.9253757179,10.5520464748  
C,0,13.2167035712,14.4424237895,4.7434317556  
C,0,12.9232119005,13.5862301673,3.6673550751  
C,0,13.0940508922,14.0053906003,2.3585353507  
C,0,13.5616214017,15.2927145806,2.0672036763  
C,0,13.8599939828,16.1421121824,3.1133409644  
C,0,13.6957600279,15.753117548,4.461496065  
C,0,14.0546402167,16.7296910573,5.4509212964  
C,0,14.3767731741,17.6663716872,7.561498972  
C,0,15.0934362387,18.8580128339,7.1335520058  
C,0,14.2585985524,17.7220440342,8.9308019705  
C,0,15.6497287354,20.9236358588,8.3892518816  
C,0,16.7161044262,21.4442669791,7.6547247658  
C,0,16.970848737,22.8112990175,7.6989443632  
C,0,16.1868054786,23.6517959765,8.487068092  
C,0,15.1301164038,23.1211451473,9.2240482811  
C,0,14.8478002543,21.7596211831,9.1696165056  
C,0,15.5342394414,18.9350293543,10.6567868735  
C,0,13.689153608,16.6958669454,9.8643886986  
C,0,12.9533416729,9.6009493857,5.5816154936  
C,0,13.1803538546,8.7764536851,4.4485368348  
C,0,13.3237543219,7.4092706836,4.5587402691  
C,0,13.2547555812,6.7701598626,5.8090167602  
C,0,13.0378443549,7.5405074379,6.9292774497  
C,0,12.8797298793,8.9452179196,6.8571571271  
C,0,12.6544862457,9.6221122783,8.1016900802  
C,0,12.194715509,11.4632365296,9.5858234809  
C,0,12.5836253689,12.9545955887,9.4551467333  
C,0,14.1087944516,12.86270914,9.6807007011  
C,0,10.7477218322,11.229291988,9.961709979  
C,0,15.5899613811,11.0791269433,10.598057032  
C,0,16.7557731311,11.851958202,10.6698288629  
C,0,17.9705686233,11.2311928401,10.9417236295  
C,0,18.0410114228,9.8563225775,11.1557712485  
C,0,16.874994189,9.0973226414,11.0933139125  
C,0,15.6515418841,9.6985891432,10.8172787647  
C,0,12.7880937176,11.0155521663,11.9676479939  
H,0,12.2104931661,14.6652064342,10.1630336567  
H,0,12.5856571513,12.5800339152,3.8953741942  
H,0,12.8608285233,13.3179579846,1.5498248227  
H,0,13.6923387166,15.6155554925,1.039839303  
H,0,14.2298860477,17.1438933096,2.9107675483  
H,0,14.5086960734,17.647621679,5.0714599695  
H,0,17.3286048784,20.7802370461,7.0562420614  
H,0,17.7970752458,23.2179041751,7.1234796415  
H,0,16.398627941,24.7158884821,8.5270431965  
H,0,14.5105227626,23.7697397162,9.8360275005  
H,0,14.0078386897,21.3438414535,9.7175532687  
H,0,15.732692111,19.9752733813,10.9138426766  
H,0,14.9092049589,18.5036795399,11.4381829391  
H,0,16.4783688292,18.3845054262,10.5889222685  
H,0,13.3046813267,17.219153948,10.7545363168  
H,0,14.5165339428,16.0489450935,10.209375853  
H,0,13.2362423279,9.2686547153,3.4822144716  
H,0,13.4944169588,6.8200341959,3.6612453601  
H,0,13.3712286933,5.6945880619,5.8885602337  
H,0,12.9808189091,7.0706284041,7.9087079366  
H,0,12.6495070059,8.9943691616,8.9983063946  
H,0,10.556484903,10.1628871193,10.1114543506  
H,0,10.4782635968,11.7850561643,10.8601695912  
H,0,10.1210014297,11.5802461525,9.1385525679  
H,0,16.7038123648,12.9193905751,10.5010734099  
H,0,18.8710638377,11.8365803762,10.9918143211

H,0,18.9936056317,9.3825866416,11.3722658847  
H,0,16.9117576478,8.02456536,11.259419027  
H,0,14.7425528263,9.1104676776,10.7638778744  
H,0,12.5501272729,12.0386846016,12.2808987994  
H,0,11.9345553252,10.3612318331,12.1490866537  
H,0,13.6272109625,10.6405849674,12.557807587

|                                              |              |
|----------------------------------------------|--------------|
| Sum of electronic and zero-point Energies=   | -5523.674746 |
| Sum of electronic and thermal Energies=      | -5523.630126 |
| Sum of electronic and thermal Enthalpies=    | -5523.629182 |
| Sum of electronic and thermal Free Energies= | -5523.755312 |
